# Supplementary material for: Chemical crosslinking and mass spectrometry to elucidate the topology of integral membrane proteins
Source: PLoS One. 2017 Oct 26;12(10):e0186840. doi: 10.1371/journal.pone.0186840 (PMC5658093; doi:10.1371/journal.pone.0186840)
Supplement: S2 Table — (XLSX) [file pone.0186840.s002.xlsx]

## Sheet: Legend S2 Table
S2 Table. Statistics of crosslinks found by StavroX
This table analyzes the length of peptides involved in XLs listed in S10-S13 Tables.

## Sheet: Length of peptides S10 Table
The XLs identified by StavroX between amino acids of non-overlapping peptides in 13 MSPs. We arbitrarily chose to collect the data for yeast proteins having names starting with A, B, C or D.
	BS3				EDC
	Number of amino acis in peptide 1	Number of amino acis in peptide2	Protein		Number of amino acis in peptide 1	Number of amino acis in peptide2	Protein		number of amino acis per peptide	BS3 peptide 1	BS3 peptide 2	EDC peptide 1	EDC peptide 2	BS3 + EDC peptide 1	BS3 + EDC peptide 2
	4	6	Ale1p		4	5	Are1p		4	59	1	13	0	72	1
	4	6	Are1p		5	5	Are1p		5	76	9	24	6	100	15
	4	7	Are1p		4	5	Drs2p		6	33	18	12	1	45	19
	4	21	Are1p		4	5	Drs2p		7	43	36	18	14	61	50
	4	27	Are1p		4	5	Drs2p		8	23	38	8	18	31	56
	4	27	Are1p		4	5	Drs2p		9	23	18	5	7	28	25
	4	8	Are2p		4	6	Cds1p		10	11	15	9	6	20	21
	4	8	Are2p		5	7	Ale1p		11 and 12	29	49	1	17	30	66
	4	10	Are2p		5	7	Aur1p		13-14	21	27	1	10	22	37
	4	10	Are2p		5	7	Aur1p		15-16	8	46	4	3	12	49
	4	11	Are2p		5	7	Aur1p		17-18	2	26	1	1	3	27
	4	11	Are2p		5	7	Aur1p		19-37	3	48	0	13	3	61
	4	11	Are2p		5	7	Aur1p		SUM	331	331	96	96	427	427
	4	11	Are2p		4	7	Cds1p
	4	12	Are2p		5	7	Cds1p		peptide 1
	4	5	Arv1p		6	7	Cpt1p		number of amino acis per peptide	BS3	EDC
	4	5	Arv1p		6	7	Dnf1p		4	59	13
	4	8	Arv1p		6	7	Dnf1p		5	76	24
	4	8	Arv1p		5	7	Drs2p		6	33	12
	4	8	Arv1p		5	7	Drs2p		7	43	18
	4	11	Atm1p		6	7	Drs2p		8	23	8
	4	11	Atm1p		5	8	Ale1p		9	23	5
	4	11	Atm1p		5	8	Ale1p		10	11	9
	4	11	Atm1p		4	8	Are1p		11 to 12	29	1
	4	21	Atm1p		5	8	Are1p		13-14	21	1
	4	7	Cds1p		6	8	Are1p		15-16	8	4
	4	7	Cds1p		7	8	Arv1p		17-18	2	1
	4	11	Cho2p		7	8	Aur1p		19-37	3	0
	4	18	Cho2p		7	8	Aur1p			331	96
	4	18	Cho2p		7	8	Cds1p
	4	25	Cho2p		7	8	Cds1p
	4	7	Crd1p		7	8	Cds1p
	4	7	Crd1p		5	8	Cho2p
	4	7	Crd1p		5	8	Crd1p
	4	7	Crd1p		6	8	Dgk1p
	4	7	Crd1p		6	8	Dgk1p
	4	7	Crd1p		4	8	Dnf1p
	4	7	Crd1p		7	8	Dnf1p
	4	7	Crd1p		7	8	Dnf1p
	4	28	Crd1p		5	9	Are1p
	4	5	Csg2p		5	9	Are1p
	4	11	Csg2p		7	9	Are2p
	4	11	Csg2p		5	9	Arv1p
	4	8	Dgk1p		7	9	Atm1p
	4	8	Dgk1p		7	9	Cho2p
	4	8	Dgk1p		5	9	Dgk1p
	4	12	Dgk1p		7	10	Ale1p
	4	26	Dgk1p		4	10	Are1p
	4	7	Dnf1p		6	10	Dnf1p
	4	7	Dnf1p		9	10	Dnf1p
	4	9	Dnf1p		10	10	Dnf1p
	4	9	Dnf1p		6	10	Drs2p
	4	10	Dnf1p		8	11	Cds1p
	4	11	Dnf1p		10	11	Cds1p
	4	12	Dnf1p		9	11	Cho2p
	4	13	Dnf1p		9	11	Cho2p
	4	17	Dnf1p		9	11	Cho2p
	4	6	Drs2p		6	11	Csg2p
	4	8	Drs2p		5	11	Dgk1p
	5	7	Ale1p		8	11	Dnf1p
	5	7	Ale1p		4	12	Are2p
	5	7	Ale1p		4	12	Are2p
	5	9	Ale1p		6	12	Are2p
	5	9	Ale1p		6	12	Are2p
	5	10	Ale1p		8	12	Arv1p
	5	15	Ale1p		8	12	Cho2p
	5	6	Are1p		8	12	Cho2p
	5	6	Are1p		7	12	Dnf1p
	5	8	Are1p		7	12	Dnf1p
	5	21	Are1p		11	13	Ale1p
	5	5	Are2p		7	13	Drs2p
	5	5	Are2p		7	13	Drs2p
	5	5	Are2p		7	13	Drs2p
	5	5	Arv1p		8	14	Are2p
	5	6	Arv1p		8	14	Cds1p
	5	11	Arv1p		10	14	Cds1p
	5	12	Arv1p		5	14	Dnf1p
	5	12	Arv1p		7	14	Dnf1p
	5	12	Arv1p		8	14	Dnf1p
	5	13	Arv1p		13	15	Are1p
	5	21	Arv1p		9	15	Are2p
	5	6	Atm1p		4	15	Crd1p
	5	8	Atm1p		5	18	Cho2p
	5	8	Atm1p		5	19	Are1p
	5	11	Atm1p		5	19	Are1p
	5	12	Atm1p		16	21	Cds1p
	5	16	Atm1p		16	21	Cds1p
	5	20	Atm1p		16	21	Cds1p
	5	31	Atm1p		10	25	Are2p
	5	31	Atm1p		10	25	Are2p
	5	6	Aur1p		10	25	Are2p
	5	6	Aur1p		10	25	Are2p
	5	6	Aur1p		10	25	Are2p
	5	7	Aur1p		10	25	Are2p
	5	7	Aur1p		17	25	Cds1p
	5	7	Aur1p		15	27	Are1p
	5	7	Aur1p
	5	7	Aur1p
	5	7	Aur1p
	5	7	Cds1p
	5	8	Cds1p
	5	19	Cds1p
	5	19	Cds1p
	5	6	Cho2p
	5	7	Cho2p
	5	13	Cho2p
	5	30	Cho2p
	5	30	Cho2p
	5	7	Crd1p
	5	7	Crd1p
	5	9	Crd1p
	5	9	Crd1p
	5	13	Crd1p
	5	14	Crd1p
	5	14	Crd1p
	5	15	Crd1p
	5	7	Dnf1p
	5	7	Dnf1p
	5	7	Dnf1p
	5	15	Dnf1p
	5	15	Dnf1p
	5	4	Drs2p
	5	5	Drs2p
	5	5	Drs2p
	5	8	Drs2p
	5	8	Drs2p
	5	8	Drs2p
	5	8	Drs2p
	5	8	Drs2p
	5	8	Drs2p
	5	8	Drs2p
	5	8	Drs2p
	5	9	Drs2p
	5	10	Drs2p
	5	10	Drs2p
	6	17	Ale1p
	6	7	Are1p
	6	8	Are1p
	6	9	Are1p
	6	9	Are1p
	6	9	Are1p
	6	14	Are1p
	6	15	Are1p
	6	15	Are1p
	6	15	Are1p
	6	15	Are1p
	6	14	Are2p
	6	13	Arv1p
	6	15	Aur1p
	6	15	Aur1p
	6	8	Cds1p
	6	8	Cds1p
	6	8	Cds1p
	6	8	Cds1p
	6	21	Cds1p
	6	21	Cds1p
	6	12	Cho2p
	6	9	Csg2p
	6	6	Dnf1p
	6	6	Dnf1p
	6	15	Dnf1p
	6	6	Drs2p
	6	6	Drs2p
	6	6	Drs2p
	6	6	Drs2p
	6	7	Drs2p
	6	15	Drs2p
	6	15	Drs2p
	7	17	Ale1p
	7	17	Ale1p
	7	10	Are1p
	7	9	Are2p
	7	12	Are2p
	7	12	Are2p
	7	8	Arv1p
	7	11	Arv1p
	7	12	Arv1p
	7	16	Arv1p
	7	16	Arv1p
	7	16	Arv1p
	7	15	Atm1p
	7	15	Atm1p
	7	6	Aur1p
	7	12	Aur1p
	7	12	Aur1p
	7	12	Aur1p
	7	12	Aur1p
	7	12	Aur1p
	7	12	Aur1p
	7	12	Aur1p
	7	15	Aur1p
	7	21	Aur1p
	7	8	Cds1p
	7	8	Cds1p
	7	10	Cds1p
	7	7	Crd1p
	7	7	Crd1p
	7	7	Crd1p
	7	7	Crd1p
	7	8	Crd1p
	7	8	Crd1p
	7	22	Dgk1p
	7	22	Dgk1p
	7	8	Dnf1p
	7	9	Dnf1p
	7	11	Dnf1p
	7	14	Dnf1p
	7	18	Dnf1p
	7	23	Drs2p
	7	23	Drs2p
	7	23	Drs2p
	8	8	Are1p
	8	10	Are1p
	8	10	Arv1p
	8	13	Arv1p
	8	7	Cds1p
	8	8	Cds1p
	8	8	Cds1p
	8	8	Cds1p
	8	8	Cds1p
	8	17	Cds1p
	8	17	Cds1p
	8	18	Cds1p
	8	9	Cho2p
	8	9	Cho2p
	8	12	Cho2p
	8	12	Crd1p
	8	19	Csg2p
	8	10	Dgk1p
	8	14	Dnf1p
	8	19	Dnf1p
	8	10	Drs2p
	8	13	Drs2p
	8	15	Drs2p
	9	9	Ale1p
	9	13	Are2p
	9	15	Are2p
	9	15	Are2p
	9	15	Are2p
	9	12	Atm1p
	9	13	Atm1p
	9	13	Atm1p
	9	14	Cds1p
	9	23	Cds1p
	9	8	Cho2p
	9	12	Cho2p
	9	14	Cho2p
	9	14	Cho2p
	9	20	Cho2p
	9	11	Crd1p
	9	15	Crd1p
	9	9	Csg2p
	9	9	Csg2p
	9	13	Csg2p
	9	13	Csg2p
	9	13	Csg2p
	9	25	Dnf1p
	10	17	Ale1p
	10	13	Are1p
	10	22	Are2p
	10	10	Cds1p
	10	10	Cds1p
	10	10	Cds1p
	10	11	Cds1p
	10	11	Cds1p
	10	11	Csg2p
	10	12	Dgk1p
	10	21	Drs2p
	11	17	Ale1p
	11	20	Ale1p
	11	20	Ale1p
	11	14	Are1p
	11	19	Are1p
	11	19	Are1p
	11	16	Are2p
	11	16	Are2p
	11	16	Are2p
	11	23	Are2p
	11	23	Are2p
	11	12	Arv1p
	11	12	Arv1p
	11	12	Arv1p
	11	12	Arv1p
	11	20	Arv1p
	11	21	Atm1p
	11	13	Cds1p
	11	22	Cds1p
	12	18	Are1p
	12	15	Are2p
	12	15	Are2p
	12	17	Atm1p
	12	12	Cho2p
	12	12	Cho2p
	12	14	Drs2p
	12	18	Drs2p
	12	18	Drs2p
	12	18	Drs2p
	13	17	Cho2p
	13	17	Cho2p
	13	17	Cho2p
	13	17	Cho2p
	13	24	Crd1p
	13	18	Csg2p
	13	34	Dgk1p
	13	13	Dnf1p
	13	16	Drs2p
	13	16	Drs2p
	13	16	Drs2p
	13	16	Drs2p
	13	18	Drs2p
	14	18	Ale1p
	14	15	Are2p
	14	15	Are2p
	14	15	Are2p
	14	15	Are2p
	14	16	Cho2p
	14	16	Cho2p
	14	23	Drs2p
	15	16	Crd1p
	15	16	Crd1p
	15	16	Crd1p
	15	16	Crd1p
	15	16	Crd1p
	15	16	Crd1p
	16	26	Arv1p
	16	17	Cho2p
	17	17	Drs2p
	18	24	Are1p
	22	27	Are2p
	23	26	Dgk1p
	23	26	Dgk1p

## Sheet: Length of peptides S11 Table
For three non-yeast proteins (BSA, HsDrs2p and HsNeo1p), StavroX made D1 files and compared theoretical XLs to the experimental mgf files. This resulted in XLs reported in S11 Table.
The columns B to G contain one individual XL per row characterized by two numbers that indicate the number of amino acids in peptide 1 and 2, respectively.
Columns J to O C contain the number of XLs identified by StavroX having the number of amino acids in peptide 1 or 2 indicated in column I. The same information is present in columns Q to W, but grouped into peptide length classes with n or n+1 amino acids.
The XLs from BSA, HsDrs2p and HsNeo1p are written in red, blue and black respectively as shown in Column H.
	Controls wtih proteins from other species
	BS3		EDC		BS3 and EDC
	peptide 1	peptide 2	peptide 1	peptide 2	peptide 1	peptide 2	BSA
	4	4	4	6	4	4	HsDrs2p
	4	4	4	6	4	4	HsNeo1p
	4	5	4	7	4	5
	4	6	4	7	4	6
	4	6	4	8	4	6
	4	6	4	8	4	6
	4	6	4	8	4	6
	4	6	4	8	4	6
	4	7	4	10	4	6
	4	7	4	10	4	6
	4	7	5	11	4	7
	4	7	5	12	4	7
	4	7	5	13	4	7
	4	8	5	14	4	7
	5	8	5	16	4	7
	5	8	5	19	4	7
	5	8	5	19	4	7		number of amino acis per peptide	BS3, peptide 1	BS3, peptide 2	EDC, peptide 1	EDC, peptide 2	BS3 + EDC, peptide 1	BS3 + EDC, peptide 2		number of amino acis per peptide	BS3, peptide 1	BS3, peptide 2	EDC, peptide 1	EDC, peptide 2	BS3 + EDC, peptide 1	BS3 + EDC, peptide 2
	5	10	5	19	4	8		4	14	2	10	0	24	2		4	14	2	10	0	24	2
	5	10	5	19	4	8		5	10	1	9	0	19	1		5	10	1	9	0	19	1
	5	10	6	19	4	8		6	9	5	3	2	12	7		6	9	5	3	2	12	7
	5	11	6	19	4	8		7		5		2	0	7		7	0	5	0	2	0	7
	5	11	6	27	4	8		8		4		4	0	8		8	0	4	0	4	0	8
	5	11			4	8		9		0		0	0	0		9 to 10	0	3	0	2	0	5
	5	11			4	8		10		3		2	0	5		11 to 12	0	4	0	2	0	6
	6	13			5	8		11		4		1	0	5		13-14	0	1	0	2	0	3
	6	15			5	10		12		0		1	0	1		15-16	0	2	0	1	0	3
	6	15			5	10		13		1		1	0	2		17-18	0	3	0	0	0	3
	6	17			5	10		14		0		1	0	1		19-32	0	3	0	7	0	10
	6	17			5	10		15		2		0	0	2			33	33	22	22	55	55
	6	18			5	10		16		0		1	0	1
	6	22			5	11		17		2		0	0	2
	6	29			5	11		18		1		0	0	1
	6	32			5	11		19		0		6	0	6
					5	11		20-32		3		1	0	4
					5	11		SUM	33	33	22	22	55	55
					5	12
					5	13
					5	13
					5	14
					5	15
					5	15
					5	16
					5	17
					6	17
					6	18
					6	19
					6	19
					6	19
					6	19
					6	19
					6	19
					6	22
					6	27
					6	29
					6	32

## Sheet: Length of peptides S12 Table
For seven pairs of proteins residing in different compartments or complexes, StavroX made D1 files of all theoretical inter-protein XLs and compared them to the experimental mgf files. This resulted in protein-protein XLs reported in S12 Table.
The columns B to G contain one individual [protein 1 to protein 2]-XL per row, characterized by two numbers that indicate the number of amino acids in peptide 1 and 2, respectively.
Columns J to O C contain the number of inter-protein XLs identified by StavroX having the number of amino acids in peptide 1 or 2 indicated in column I. The same information is present in columns Q to W, but grouped into peptide length classes with n or n+1 amino acids.
The XLs from different protein pairs are color coded as indicated in Column H.
	BS3		EDC		BS3 + EDC
	peptide 1	peptide 2	peptide 1	peptide 2	peptide 1	peptide 2
	4	5	4	4	4	4	Cho2p_Taz1p
	4	7	4	4	4	4	Dnf1p_Taz1p
	4	7	4	5	4	5	Gpt2p_Gpi8p
	4	7	4	6	4	5	Ipt1p_Taz1p
	4	7	4	6	4	6	Lcb1p_Gpi8p
	4	7	4	6	4	6	Lcb1p_Taz1p
	4	7	4	6	4	6	Neo1p_Taz1p
	4	8	4	7	4	6
	4	8	4	7	4	7
	4	8	4	8	4	7
	4	8	4	9	4	7
	4	9	4	9	4	7
	4	9	4	9	4	7
	4	9	4	10	4	7
	4	9	4	11	4	7
	4	9	4	11	4	7
	4	9	5	12	4	8
	4	9	5	12	4	8
	4	9	6	12	4	8
	4	9	6	12	4	8		number of amino acis per peptide	BS3, peptide 1	BS3, peptide 2	EDC, peptide 1	EDC, peptide 2	BS3 + EDC, peptide 1	BS3 + EDC, peptide 2		number of amino acis per peptide	BS3, peptide 1	BS3, peptide 2	EDC, peptide 1	EDC, peptide 2	BS3 + EDC, peptide 1	BS3 + EDC, peptide 2
	4	10	6	12	4	8		4	22	0	16	2	38	2		4	22	0	16	2	38	2
	4	10	6	12	4	9		5	9	1	2	1	11	2		5	9	1	2	1	11	2
	5	10	6	18	4	9		6	14	0	6	4	20	4		6	14	0	6	4	20	4
	5	12	6	22	4	9		7		6	1	2	1	8		7 or 8	0	10	1	3	1	13
	5	12	7	24	4	9		8		4		1		5		9 or 10	0	12	0	4	0	17
	5	12			4	9		9		9		3		13		11 or 12	0	6	0	8	0	14
	5	12			4	9		10		3		1		4		13 or 14	0	8	0	0	0	8
	5	12			4	9		11		0		2		2		15 or 16	0	3	0	0	0	3
	5	12			4	9		12		6		6		12		17 or 18	0	3	0	1	0	4
	5	13			4	9		13		7		0		7		19 - 32	0	2	0	2	0	4
	5	13			4	9		14		1		0		1			45	45	25	25	70	71
	6	13			4	9		15		1		0		1
	6	13			4	10		16		2		0		2			BS3, peptide 1	BS3, peptide 2	EDC, peptide 1	EDC, peptide 2	BS3 + EDC, peptide 1	BS3 + EDC, peptide 2
	6	13			4	10		17		2		0		2		4	22	0	16	2	38	2
	6	13			4	10		18		1		1		2		5	9	1	2	1	11	2
	6	13			4	10		19		1		0		1		6	14	0	6	4	20	4
	6	14			4	11		20-32		1		2		3		7	0	6	1	2	1	8
	6	15			4	11		SUM	45	45	25	25	70	71		8	0	4	0	1	0	5
	6	16			5	12										9	0	9	0	3	0	12
	6	16			5	12										10	0	3	0	1	0	4
	6	17			5	12											0	6	0	8	0	14
	6	17			5	12										13-14	0	8	0	0	0	8
	6	18			5	12										15-16	0	3	0	0	0	3
	6	19			5	12										17-18	0	3	0	1	0	4
	6	20			5	12										19-32	0	2	0	2	0	4
					5	12											45	45	24	24	69	69
					5	12
					5	12
					5	12
					6	12
					6	13
					6	13
					6	13
					6	13
					6	13
					6	13
					6	13
					6	14
					6	15
					6	16
					6	16
					6	17
					6	17
					6	18
					6	18
					6	19
					6	20
					6	22
					6	24

## Sheet: Length of peptides in S13 Table
For three pairs of proteins residing in the same complex, StavroX made D1 files of all theoretical inter-protein XLs and compared them to the experimental mgf files. This resulted in protein-protein XLs reported in S13 Table.
The columns B to G contain one individual [protein 1 to protein 2]-XL per row, characterized by two numbers that indicate the number of amino acids in peptide 1 and 2, respectively.
Columns J to O C contain the number of inter-protein XLs identified by StavroX having the number of amino acids in peptide 1 or 2 indicated in column I. The same information is present in columns Q to W, but grouped into peptide length classes with n or n+1 amino acids.
The XLs from different protein pairs are color coded as indicated in Column H.
	BS3		EDC		BS3 + EDC
	peptide 1	peptide 2	peptide 1	peptide 2	peptide 1	peptide 2
	3	5	3	5	3	5	Ist2p-Tcb1p
	3	7	3	5	3	5	Pma1p-Pma2p
	3	7	4	6	3	5	Sec61p-Sss1p
	3	7	4	7	3	6
	4	7	4	9	3	7
	4	8	4	9	3	7
	4	8	4	10	4	7
	4	8	5	11	4	7
	4	9	5	11	4	7
	4	9	6	11	4	8
	4	10	7	11	4	8
	5	10	7	11	4	8
	5	11	8	11	4	9
	5	11	10	12	4	9
	5	11	10	17	4	9
	5	11	10	17	4	9
	5	11	11	17	4	10
	6	11	11	19	4	10
	7	11	11	23	5	10
	7	11	12	23	5	11		number of amino acis per peptide	BS3, peptide 1	BS3, peptide 2	EDC, peptide 1	EDC, peptide 2	BS3 + EDC, peptide 1	BS3 + EDC, peptide 2		number of amino acis per peptide	BS3, peptide 1	BS3, peptide 2	EDC, peptide 1	EDC, peptide 2	BS3 + EDC, peptide 1	BS3 + EDC, peptide 2
	7	12			5	11		3	4	0	2	0	6	0		3	4	0	2	0	6	0
	7	12			5	11		4	7	0	5	0	12	0		4	7	0	5	0	12	0
	7	12			5	11		5	6	1	2	2	8	3		5	6	1	2	2	8	3
	7	14			5	11		6	1	0	1	1	2	1		6	1	0	1	1	2	1
	7	14			5	11		7	7	4	2	1	9	5		7 or 8	12	7	3	1	15	8
	8	14			5	11		8	5	3	1	0	6	3		9 or 10	6	4	3	3	9	7
	8	14			6	11		9	3	2	0	2	3	4		11 or 12	10	11	4	7	14	18
	8	14			6	11		10	3	2	3	1	6	3		13 or 14	0	6	0	0	0	6
	8	14			7	11		11	6	8	3	6	9	14		15 or 16	0	6	0	0	0	6
	8	15			7	11		12	4	3	1	1	5	4		17 or 18	2	5	0	4	2	9
	9	15			7	11		13	0	0		0	0	0		19 - 32	0	8	0	2	0	10
	9	15			7	11		14	0	6		0	0	6		SUM	48	48	20	20	68	68
	9	15			7	11		15	0	6		0	0	6
	10	15			7	12		16	0	0		0	0	0
	10	15			7	12		17	2	4		4	2	8
	10	17			7	12		18		1		0	0	1
	11	17			7	12		19		1		1	0	2
	11	17			8	14		20-32		7		1	0	8
	11	17			8	14		SUM	48	48	20	20	68	68
	11	18			8	14										number of amino acis per peptide	BS3, peptide 1	BS3, peptide 2	EDC, peptide 1	EDC, peptide 2	BS3 + EDC, peptide 1	BS3 + EDC, peptide 2
	11	19			8	14										3	4	0	2	0	6	0
	11	20			8	14										4	7	0	5	0	12	0
	12	20			8	14										5	6	1	2	2	8	3
	12	20			9	15										6	1	0	1	1	2	1
	12	20			9	15										7	7	4	2	1	9	5
	12	20			9	15										8	5	3	1	0	6	3
	17	22			10	15										9	3	2	0	2	3	4
	17	23			10	15										10	3	2	3	1	6	3
					10	15										11 or 12	10	11	4	7	14	18
					10	17										13 or 14	0	6	0	0	0	6
					10	17										15 or 16	0	6	0	0	0	6
					10	17										17 or 18	2	5	0	4	2	9
					11	17										19 - 32	0	8	0	2	0	10
					11	17											48	48	20	20	68	68
					11	17
					11	17
					11	18
					11	19
					11	19
					11	20
					11	20
					12	20
					12	20
					12	20
					12	22
					12	23
					17	23
					17	23

## Sheet: Comparison Controls and MSPs
Lines 6 to 21 report on length of peptides 1 and 2 in MSPs, negative and positive controls, lines 222-36 report on length of peptide 1 in MSPs, negative and positive controls
Here we compare the distributions of the length of the shortest peptide in XLs obtained for controls (S11 to S13 Tables) with those identified between peptides belonging to individual yeast MSPs (S10 Table).
Columns A to C are from sheet "Length of peptides S12 Table"; Columns D to F are from sheet "Length of peptides S13 Table"; columns G to K are from sheet "Length of peptides S10 Table".
Length of crosslinked petides in 13 MSPs with names starting with A, B, C, D (S10 Table)								Length of crosslinked peptides in proteins not present in the samples (S11 Table)								Length of peptides in XLs between spatially separated proteins (S12 Table)								Length of peptides in XLs between adjacent proteins (S13 Table)
number of amino acis per peptide	BS3, peptide 1	BS3, peptide 2	EDC peptide 1	EDC peptide 2	BS3 + EDC peptide 1	BS3 + EDC peptide 2		number of amino acis per peptide	BS3, peptide 1	BS3, peptide 2	EDC, peptide 1	EDC, peptide 2	BS3 + EDC, peptide 1	BS3 + EDC, peptide 2		number of amino acis per peptide	BS3, peptide 1	BS3, peptide 2	EDC, peptide 1	EDC, peptide 2	BS3 + EDC, peptide 1	BS3 + EDC, peptide 2		number of amino acis per peptide	BS3, peptide 1	BS3, peptide 2	EDC, peptide 1	EDC, peptide 2	BS3 + EDC, peptide 1	BS3 + EDC, peptide 2
4	57	0	13	0	70	0		4	14	2	10	0	24	2		4	22	0	16	2	38	2		3	4	0	2	0	6	0
5	62	7	24	6	86	13		5	10	1	9	0	19	1		5	9	1	2	1	11	2		4	7	0	5	0	12	0
6	26	13	12	1	38	14		6	9	5	3	2	12	7		6	14	0	6	4	20	4		5	6	1	2	2	8	3
7	40	35	18	14	58	49		7		5		2	0	7		7		6	1	2		8		6	1	0	1	1	2	1
8	20	29	8	18	28	47		8		4		4	0	8		8		4		1		5		7	7	4	2	1	9	5
9	23	17	5	7	28	24		9		0		0	0	0		9		9		3		12		8	5	3	1	0	6	3
10	10	12	9	6	19	18		10		3		2	0	5		10		3		1		4		9	3	2	0	2	3	4
11 to 12	25	49	1	17	26	66		11 or 12	0	4	0	2	0	6		11 or 12	0	6	0	8	0	14		10	3	2	3	1	6	3
13-14	15	25	1	10	16	35		13 or 14	0	1	0	2	0	3		13 or 14	0	8	0	0	0	8		11 or 12	10	11	4	7	14	18
15-16	8	39	4	3	12	42		15 or 16	0	2	0	1	0	3		15 or 16	0	3	0	0	0	3		13 or 14	0	6	0	0	0	6
17-18	1	21	1	1	2	22		17 or 18	0	3	0	0	0	3		17 or 18	0	3	0	1	0	4		15 or 16	0	6	0	0	0	6
19-37	3	43	0	13	3	56		19 - 32	0	3	0	7	0	10		19 - 32	0	2	0	2	0	4		17 or 18	2	5	0	4	2	9
SUM	290	290	96	96	386	386			33	33	22	22	55	55			45	45	24	24	69	69		19 - 32	0	8	0	2	0	10
																									48	48	20	20	68	68
	peptide 1								peptide 1								peptide 1								peptide 1
number of amino acis per peptide 1	BS3	EDC	BS3 + EDC peptide 1					number of amino acis per peptide 1	BS3, peptide 1	EDC, peptide 1	BS3 + EDC, peptide 1					number of amino acis per peptide	BS3, peptide 1	EDC, peptide 1	BS3 + EDC, peptide 1					number of amino acis per peptide	BS3, peptide 1	EDC, peptide 1	BS3 + EDC, peptide 1
4	57	13	70					4	14	10	24					4	22	16	38					3	4	2	6
5	62	24	86					5	10	9	19					5	9	2	11					4	7	5	12
6	26	12	38					6	9	3	12					6	14	6	20					5	6	2	8
7	40	18	58					7	0	0	0					7	0	1	1					6	1	1	2
8	20	8	28					8	0	0	0					8	0	0	0					7	7	2	9
9	23	5	28					9	0	0	0					9	0	0	0					8	5	1	6
10	10	9	19					10	0	0	0					10	0	0	0					9	3	0	3
11 to 12	25	1	26					11 or 12	0	0	0					11 or 12	0	0	0					10	3	3	6
13-14	15	1	16					13 or 14	0	0	0					13 or 14	0	0	0					11 or 12	10	4	14
15-16	8	4	12					15 or 16	0	0	0					15 or 16	0	0	0					13 or 14	0	0	0
17-18	1	1	2					17 or 18	0	0	0					17 or 18	0	0	0					15 or 16	0	0	0
19-37	3	0	3					19 - 32	0	0	0					19 - 32	0	0	0					17 or 18	2	0	2
	290	96	386																					19 - 32	0	0	0
number of amino acis per peptide 1	BS3 + EDC, XLs in absent proteins	BS3 + EDC, XLs btw. distant proteins	BS3 + EDC XLs in MSPs
4	24	38	70
5	19	11	86
6	12	20	38
7	0	1	58
8	0	0	28
9	0	0	28
10	0	0	19
11 and 12	0	0	26
13-14	0	0	16
15-16	0	0	12
17-18	0	0	2
19-37	0	0	3
