# Supplementary material for: Chemical crosslinking and mass spectrometry to elucidate the topology of integral membrane proteins
Source: PLoS One. 2017 Oct 26;12(10):e0186840. doi: 10.1371/journal.pone.0186840 (PMC5658093; doi:10.1371/journal.pone.0186840)
Supplement: S13 Table — (XLSX) [file pone.0186840.s013.xlsx]

## Sheet: Table_legend
S13 Table. Crosslinks found by StavroX in adjacent proteins
The pages report the theoretical XLs within the pair of yeast adjacent proteins detected by StavroX in the mgf-files or merged mgf-files of our yeast membrane protein samples. If fragmentations of a given ion species do not allow to unequivocally determine, which amino acid of peptide-1 is linked to which amino acid of peptide-2, StavroX produces a separate entry for each possibility. To make the…

## Sheet: Ist2p-Tcb1p
Ist2p-Tcb1p_BS3
FDR<0.05	Nr.	Score	m/z	z	M+H+	calc.	Dev.	Peptide(1)	Protein(1)	From(1)	To(1)	Peptide(2)	Protein(2)	From(1)	To(2)	Site(1)	Site(2)	Rank	Scan	RT	Misc.
425	1	465	943.108	3	2827.31	2827.32	-2.08	[KPLATESTEK]	>sp|P38250	708	717	[YYINNEEDJAYK]	>sp|Q12466	1019	1030	K708	Y1029		20160201_Debelyy_8080-SCX5.28829.28829.3	6379.57	(H)
228	1	232	584.316	4	2334.24	2334.25	-2.25	[LEPPKTK]	>sp|Q12466	28	34	[FDEDGKSIRDAK]	>sp|P38250	751	762	T33	K756		20150828_Debelyy_7720-d20x-1ul-140min.23931.23931.4	7050.61	(H)
169	5	198	1251.96	3	3753.85	3753.84	3	[WENHSSVVNAK]	>sp|P38250	285	295	[RSIHEASYVGWKQIGGWEDK]	>sp|Q12466	58	77	S289	K69		20150415_Debelyy_7263_SCX-frct-50-2ul.20900.20900.3	2993.53	(L)
169	5	198	1251.96	3	3753.85	3753.84	3	[WENHSSVVNAK]	>sp|P38250	285	295	[RSIHEASYVGWKQIGGWEDK]	>sp|Q12466	58	77	S290	K69		20150415_Debelyy_7263_SCX-frct-50-2ul.20900.20900.3	2993.53	(L)
169	6	243	572.552	4	2287.18	2287.19	-4.33	[KYRGSIR]	>sp|Q12466	151	157	[WENHSSVVNAK]	>sp|P38250	285	295	K151	S290		20150415_Debelyy_7263_SCX-frct-50-2ul.5417.5417.4	1523.47	(L)
169	6	242	572.552	4	2287.18	2287.19	-4.33	[KYRGSIR]	>sp|Q12466	151	157	[WENHSSVVNAK]	>sp|P38250	285	295	K151	S289		20150415_Debelyy_7263_SCX-frct-50-2ul.5417.5417.4	1523.47	(L)
169	7	180	994.519	3	2981.54	2981.55	-4.15	[DAGVKNVTNNSK]	>sp|P38250	906	917	[KPETAQVANINGIDK]	>sp|Q12466	13	27	K910	K13		20150415_Debelyy_7263_SCX-frct-50-2ul.19910.19910.3	2893.84	(L)
169	7	180	994.519	3	2981.54	2981.55	-4.15	[DAGVKNVTNNSK]	>sp|P38250	906	917	[KPETAQVANINGIDK]	>sp|Q12466	13	27	T913	K13		20150415_Debelyy_7263_SCX-frct-50-2ul.19910.19910.3	2893.84	(L)
169	7	169	994.519	3	2981.54	2981.55	-4.15	[DAGVKNVTNNSK]	>sp|P38250	906	917	[KPETAQVANINGIDK]	>sp|Q12466	13	27	S916	K13		20150415_Debelyy_7263_SCX-frct-50-2ul.19910.19910.3	2893.84	(L)
169	8	177	861.802	3	2583.39	2583.4	-1.56	[FFPTLEEKK]	>sp|Q12466	506	514	[KTEVSTKNGPSR]	>sp|P38250	855	866	K513	T860	1	20150415_Debelyy_7263_SCX-frct-50-2ul.20170.20170.3	2919.02	(H)
149	1	273	1251.96	3	3753.85	3753.84	3.08	[WENHSSVVNAK]	>sp|P38250	285	295	[RSIHEASYVGWKQIGGWEDK]	>sp|Q12466	58	77	S289	K69		20150415_Debelyy_7263_SCX-frct-75-2ul.17151.17151.3	2992.6	(L)
149	1	273	1251.96	3	3753.85	3753.84	3.08	[WENHSSVVNAK]	>sp|P38250	285	295	[RSIHEASYVGWKQIGGWEDK]	>sp|Q12466	58	77	S290	K69		20150415_Debelyy_7263_SCX-frct-75-2ul.17151.17151.3	2992.6	(L)
156	1	214	1251.96	3	3753.85	3753.84	3.3	[WENHSSVVNAK]	>sp|P38250	285	295	[RSIHEASYVGWKQIGGWEDK]	>sp|Q12466	58	77	S289	K69		20150415_Debelyy_7263_SCX-frct-125-2ul.14570.14570.3	2993.88	(L)
156	1	214	1251.96	3	3753.85	3753.84	3.3	[WENHSSVVNAK]	>sp|P38250	285	295	[RSIHEASYVGWKQIGGWEDK]	>sp|Q12466	58	77	S290	K69		20150415_Debelyy_7263_SCX-frct-125-2ul.14570.14570.3	2993.88	(L)
89	1	130	1251.96	3	3753.86	3753.84	4.51	[WENHSSVVNAK]	>sp|P38250	285	295	[RSIHEASYVGWKQIGGWEDK]	>sp|Q12466	58	77	S289	K69		20150415_Debelyy_7263_SCX-frct-FT-2ul.19266.19266.3	2992.13	(L)
89	1	130	1251.96	3	3753.86	3753.84	4.51	[WENHSSVVNAK]	>sp|P38250	285	295	[RSIHEASYVGWKQIGGWEDK]	>sp|Q12466	58	77	S290	K69		20150415_Debelyy_7263_SCX-frct-FT-2ul.19266.19266.3	2992.13	(L)
376	1	454	892.989	2	1784.97	1784.97	-3.07	[QKAQKK]	>sp|P38250	201	206	[EDTGVTAPK]	>sp|Q12466	4	12	K205	T9		20150730_Debelyy-M-7663-elu-dil10x-4ul-140min.32422.32422.2	6950.19	(L)
376	1	448	892.989	2	1784.97	1784.97	-3.07	[QKAQKK]	>sp|P38250	201	206	[EDTGVTAPK]	>sp|Q12466	4	12	K205	T6		20150730_Debelyy-M-7663-elu-dil10x-4ul-140min.32422.32422.2	6950.19	(L)
128	2	173	423.759	4	1692.01	1692.01	2.37	[EDKAK]	>sp|Q12466	826	830	[HKKGLLHK]	>sp|P38250	934	941	K828	K936		20160201_Debelyy_8080-FT.26908.26908.4	7911.04	(H)
128	3	135	423.76	4	1692.02	1692.01	3.86	[EDKAK]	>sp|Q12466	826	830	[HKKGLLHK]	>sp|P38250	934	941	K828	K936		20160201_Debelyy_8080-FT.23694.23694.4	6963.95	(H)
201	1	465	943.108	3	2827.31	2827.32	-2.08	[KPLATESTEK]	>sp|P38250	708	717	[YYINNEEDJAYK]	>sp|Q12466	1019	1030	K708	Y1029		20160201_Debelyy_8080-SCX5.28829.28829.3	6379.57	(H)
266	1	424	512.948	3	1536.83	1536.84	-4.26	{MAK]	>sp|Q12466	0	3	[NGPSRSISTK]	>sp|P38250	862	871	{0	S867		20160201_Debelyy_8080-SCX6.18884.18884.3	4438.84	(H)
266	1	424	512.948	3	1536.83	1536.84	-4.26	{MAK]	>sp|Q12466	0	3	[NGPSRSISTK]	>sp|P38250	862	871	{0	S869		20160201_Debelyy_8080-SCX6.18884.18884.3	4438.84	(H)
266	1	424	512.948	3	1536.83	1536.84	-4.26	{MAK]	>sp|Q12466	0	3	[NGPSRSISTK]	>sp|P38250	862	871	{0	T870		20160201_Debelyy_8080-SCX6.18884.18884.3	4438.84	(H)
319	1	410	1271.29	3	3811.86	3811.86	2.49	[TGVVKAVDNDTAGSAGK]	>sp|P38250	691	707	[VENDYESLEWLNAFLDK]	>sp|Q12466	169	185	K695	Y173		20150415_Debelyy_7263_SCX-frct-FT-2ul.19114.19114.3	2976.44	(L)
319	1	396	1271.29	3	3811.86	3811.86	2.49	[TGVVKAVDNDTAGSAGK]	>sp|P38250	691	707	[VENDYESLEWLNAFLDK]	>sp|Q12466	169	185	K695	S175		20150415_Debelyy_7263_SCX-frct-FT-2ul.19114.19114.3	2976.44	(L)
319	2	365	1271.29	3	3811.86	3811.86	0.74	[TGVVKAVDNDTAGSAGK]	>sp|P38250	691	707	[VENDYESLEWLNAFLDK]	>sp|Q12466	169	185	K695	Y173		20150415_Debelyy_7263_SCX-frct-50-2ul.20733.20733.3	2976.82	(L)
319	2	361	1271.29	3	3811.86	3811.86	0.74	[TGVVKAVDNDTAGSAGK]	>sp|P38250	691	707	[VENDYESLEWLNAFLDK]	>sp|Q12466	169	185	K695	S175		20150415_Debelyy_7263_SCX-frct-50-2ul.20733.20733.3	2976.82	(L)
337	1	659	1499.69	2	2998.37	2998.36	2.66	[AVDNDTAGSAGK]	>sp|P38250	696	707	[KDENDKYEETIDEK]	>sp|Q12466	750	763	S704	K755		20141205_Debelyy_7182-d10x-140min.36366.36366.2	0]=6894.5976	(L)
337	1	655	1499.69	2	2998.37	2998.36	2.66	[AVDNDTAGSAGK]	>sp|P38250	696	707	[KDENDKYEETIDEK]	>sp|Q12466	750	763	T701	K755		20141205_Debelyy_7182-d10x-140min.36366.36366.2	0]=6894.5976	(L)
337	1	520	1499.69	2	2998.37	2998.36	2.66	[AVDNDTAGSAGK]	>sp|P38250	696	707	[KDENDKYEETIDEK]	>sp|Q12466	750	763	S704	K750		20141205_Debelyy_7182-d10x-140min.36366.36366.2	0]=6894.5976	(L)
337	1	513	1499.69	2	2998.37	2998.36	2.66	[AVDNDTAGSAGK]	>sp|P38250	696	707	[KDENDKYEETIDEK]	>sp|Q12466	750	763	T701	K750		20141205_Debelyy_7182-d10x-140min.36366.36366.2	0]=6894.5976	(L)
374	2	383	1237.95	3	3711.83	3711.82	3.56	[ELVQKEFTVQK]	>sp|Q12466	158	168	[DAKSSAESSNATNNNTLGTESK]	>sp|P38250	760	781	K162	T775	1	20150505_Debelyy_7439-d10x-5ul.20222.20222.3	6900.39	(L)
374	2	381	1237.95	3	3711.83	3711.82	3.56	[ELVQKEFTVQK]	>sp|Q12466	158	168	[DAKSSAESSNATNNNTLGTESK]	>sp|P38250	760	781	K162	T778	1	20150505_Debelyy_7439-d10x-5ul.20222.20222.3	6900.39	(L)
374	2	381	1237.95	3	3711.83	3711.82	3.56	[ELVQKEFTVQK]	>sp|Q12466	158	168	[DAKSSAESSNATNNNTLGTESK]	>sp|P38250	760	781	K162	S780	1	20150505_Debelyy_7439-d10x-5ul.20222.20222.3	6900.39	(L)
298	1	310	999.462	3	2996.37	2996.36	2.93	[YEPFWSDR]	>sp|P38250	177	184	[KDENDKYEETIDEK]	>sp|Q12466	750	763	Y177	K755	1	20150421_Debelyy_7438-d10x-5ul-140min.21480.21480.3	6908.12	(H)
298	1	310	999.462	3	2996.37	2996.36	2.93	[YEPFWSDR]	>sp|P38250	177	184	[KDENDKYEETIDEK]	>sp|Q12466	750	763	S182	K755	1	20150421_Debelyy_7438-d10x-5ul-140min.21480.21480.3	6908.12	(H)
342	1	608	1498.68	2	2996.36	2996.36	-2.22	[YEPFWSDR]	>sp|P38250	177	184	[KDENDKYEETIDEK]	>sp|Q12466	750	763	Y177	K755		20150807_Debelyy-M-7678-25.9621.9621.2	2832.27	(H)
342	1	580	1498.68	2	2996.36	2996.36	-2.22	[YEPFWSDR]	>sp|P38250	177	184	[KDENDKYEETIDEK]	>sp|Q12466	750	763	Y177	K750		20150807_Debelyy-M-7678-25.9621.9621.2	2832.27	(H)
342	2	576	1498.68	2	2996.36	2996.36	-2.06	[YEPFWSDR]	>sp|P38250	177	184	[KDENDKYEETIDEK]	>sp|Q12466	750	763	Y177	K755		20150807_Debelyy-M-7678-25.9587.9587.2	2824.62	(H)
342	2	575	1498.68	2	2996.36	2996.36	-2.06	[YEPFWSDR]	>sp|P38250	177	184	[KDENDKYEETIDEK]	>sp|Q12466	750	763	Y177	K750		20150807_Debelyy-M-7678-25.9587.9587.2	2824.62	(H)
299	1	575	1498.68	2	2996.36	2996.36	-0.22	[YEPFWSDR]	>sp|P38250	177	184	[KDENDKYEETIDEK]	>sp|Q12466	750	763	S182	K755		20151202_Debelyy_7987-dil10x-6ul-140min.26723.26723.2	7369.27	(H)
299	1	561	1498.68	2	2996.36	2996.36	-0.22	[YEPFWSDR]	>sp|P38250	177	184	[KDENDKYEETIDEK]	>sp|Q12466	750	763	S182	K750		20151202_Debelyy_7987-dil10x-6ul-140min.26723.26723.2	7369.27	(H)
299	3	314	548.542	4	2191.15	2191.14	2.91	[TDFK]	>sp|Q12466	695	698	[HRDAGVKNVTNNSK]	>sp|P38250	904	917	T695	K910	1	20151202_Debelyy_7987-dil10x-6ul-140min.12232.12232.4	3919.66	(H)
299	4	308	953.126	3	2857.36	2857.37	-2.69	[KKL}	>sp|P38250	944	947	[FDQEWNEVKELEDMYSNR]	>sp|Q12466	831	848	K945	K839	1	20151202_Debelyy_7987-dil10x-6ul-140min.25614.25614.3	7102.72	(L)
202	1	294	883.128	3	2647.37	2647.36	2.72	[TTQR]	>sp|Q12466	481	484	[IPSPEFNSNNEKELVQR]	>sp|P38250	619	635	T481	K630	1	20150505_Debelyy_7441-2ul.21178.21178.3	6847.74	(H)
202	1	293	883.128	3	2647.37	2647.36	2.72	[TTQR]	>sp|Q12466	481	484	[IPSPEFNSNNEKELVQR]	>sp|P38250	619	635	T482	K630	1	20150505_Debelyy_7441-2ul.21178.21178.3	6847.74	(H)
Ist2p-Tcb1p_BS3
Ions from a single experiment or merged file that were just interpreted in different ways are counted only once; lines not to be considered for the statistics are in light grey
FDR<0.05	Nr.	Score	m/z	z	M+H+	calc.	Dev.	Peptide(1)	Protein(1)	From(1)	To(1)	Peptide(2)	Protein(2)	From(1)	To(2)	Site(1)	Site(2)	Rank	Scan	RT	Misc.
128	2	173	423.759	4	1692.01	1692.01	2.37	[EDKAK]	>sp|Q12466	826	830	[HKKGLLHK]	>sp|P38250	934	941	K828	K936		20160201_Debelyy_8080-FT.26908.26908.4	7911.04	(H)
128	3	135	423.76	4	1692.02	1692.01	3.86	[EDKAK]	>sp|Q12466	826	830	[HKKGLLHK]	>sp|P38250	934	941	K828	K936		20160201_Debelyy_8080-FT.23694.23694.4	6963.95	(H)
266	1	424	512.948	3	1536.83	1536.84	-4.26	{MAK]	>sp|Q12466	1	3	[NGPSRSISTK]	>sp|P38250	862	871	{0	S867		20160201_Debelyy_8080-SCX6.18884.18884.3	4438.84	(H)
266	1	424	512.948	3	1536.83	1536.84	-4.26	{MAK]	>sp|Q12466	1	3	[NGPSRSISTK]	>sp|P38250	862	871	{0	S869		20160201_Debelyy_8080-SCX6.18884.18884.3	4438.84	(H)
266	1	424	512.948	3	1536.83	1536.84	-4.26	{MAK]	>sp|Q12466	1	3	[NGPSRSISTK]	>sp|P38250	862	871	{0	T870		20160201_Debelyy_8080-SCX6.18884.18884.3	4438.84	(H)
299	3	314	548.542	4	2191.15	2191.14	2.91	[TDFK]	>sp|Q12466	695	698	[HRDAGVKNVTNNSK]	>sp|P38250	904	917	T695	K910	1	20151202_Debelyy_7987-dil10x-6ul-140min.12232.12232.4	3919.66	(H)
169	6	243	572.552	4	2287.18	2287.19	-4.33	[KYRGSIR]	>sp|Q12466	151	157	[WENHSSVVNAK]	>sp|P38250	285	295	K151	S290		20150415_Debelyy_7263_SCX-frct-50-2ul.5417.5417.4	1523.47	(L)
169	6	242	572.552	4	2287.18	2287.19	-4.33	[KYRGSIR]	>sp|Q12466	151	157	[WENHSSVVNAK]	>sp|P38250	285	295	K151	S289		20150415_Debelyy_7263_SCX-frct-50-2ul.5417.5417.4	1523.47	(L)
228	1	232	584.316	4	2334.24	2334.25	-2.25	[LEPPKTK]	>sp|Q12466	28	34	[FDEDGKSIRDAK]	>sp|P38250	751	762	T33	K756		20150828_Debelyy_7720-d20x-1ul-140min.23931.23931.4	7050.61	(H)
169	8	177	861.802	3	2583.39	2583.4	-1.56	[FFPTLEEKK]	>sp|Q12466	506	514	[KTEVSTKNGPSR]	>sp|P38250	855	866	K513	T860	1	20150415_Debelyy_7263_SCX-frct-50-2ul.20170.20170.3	2919.02	(H)
202	1	294	883.128	3	2647.37	2647.36	2.72	[TTQR]	>sp|Q12466	481	484	[IPSPEFNSNNEKELVQR]	>sp|P38250	619	635	T481	K630	1	20150505_Debelyy_7441-2ul.21178.21178.3	6847.74	(H)
202	1	293	883.128	3	2647.37	2647.36	2.72	[TTQR]	>sp|Q12466	481	484	[IPSPEFNSNNEKELVQR]	>sp|P38250	619	635	T482	K630	1	20150505_Debelyy_7441-2ul.21178.21178.3	6847.74	(H)
376	1	454	892.989	2	1784.97	1784.97	-3.07	[QKAQKK]	>sp|P38250	201	206	[EDTGVTAPK]	>sp|Q12466	4	12	K205	T9		20150730_Debelyy-M-7663-elu-dil10x-4ul-140min.32422.32422.2	6950.19	(L)
376	1	448	892.989	2	1784.97	1784.97	-3.07	[QKAQKK]	>sp|P38250	201	206	[EDTGVTAPK]	>sp|Q12466	4	12	K205	T6		20150730_Debelyy-M-7663-elu-dil10x-4ul-140min.32422.32422.2	6950.19	(L)
425	1	465	943.108	3	2827.31	2827.32	-2.08	[KPLATESTEK]	>sp|P38250	708	717	[YYINNEEDJAYK]	>sp|Q12466	1019	1030	K708	Y1029		20160201_Debelyy_8080-SCX5.28829.28829.3	6379.57	(H)
201	1	465	943.108	3	2827.31	2827.32	-2.08	[KPLATESTEK]	>sp|P38250	708	717	[YYINNEEDJAYK]	>sp|Q12466	1019	1030	K708	Y1029		20160201_Debelyy_8080-SCX5.28829.28829.3	6379.57	(H)
299	4	308	953.126	3	2857.36	2857.37	-2.69	[KKL}	>sp|P38250	944	947	[FDQEWNEVKELEDMYSNR]	>sp|Q12466	831	848	K945	K839	1	20151202_Debelyy_7987-dil10x-6ul-140min.25614.25614.3	7102.72	(L)
169	7	180	994.519	3	2981.54	2981.55	-4.15	[DAGVKNVTNNSK]	>sp|P38250	906	917	[KPETAQVANINGIDK]	>sp|Q12466	13	27	K910	K13		20150415_Debelyy_7263_SCX-frct-50-2ul.19910.19910.3	2893.84	(L)
169	7	180	994.519	3	2981.54	2981.55	-4.15	[DAGVKNVTNNSK]	>sp|P38250	906	917	[KPETAQVANINGIDK]	>sp|Q12466	13	27	T913	K13		20150415_Debelyy_7263_SCX-frct-50-2ul.19910.19910.3	2893.84	(L)
169	7	169	994.519	3	2981.54	2981.55	-4.15	[DAGVKNVTNNSK]	>sp|P38250	906	917	[KPETAQVANINGIDK]	>sp|Q12466	13	27	S916	K13		20150415_Debelyy_7263_SCX-frct-50-2ul.19910.19910.3	2893.84	(L)
298	1	310	999.462	3	2996.37	2996.36	2.93	[YEPFWSDR]	>sp|P38250	177	184	[KDENDKYEETIDEK]	>sp|Q12466	750	763	Y177	K755	1	20150421_Debelyy_7438-d10x-5ul-140min.21480.21480.3	6908.12	(H)
298	1	310	999.462	3	2996.37	2996.36	2.93	[YEPFWSDR]	>sp|P38250	177	184	[KDENDKYEETIDEK]	>sp|Q12466	750	763	S182	K755	1	20150421_Debelyy_7438-d10x-5ul-140min.21480.21480.3	6908.12	(H)
374	2	383	1237.95	3	3711.83	3711.82	3.56	[ELVQKEFTVQK]	>sp|Q12466	158	168	[DAKSSAESSNATNNNTLGTESK]	>sp|P38250	760	781	K162	T775	1	20150505_Debelyy_7439-d10x-5ul.20222.20222.3	6900.39	(L)
374	2	381	1237.95	3	3711.83	3711.82	3.56	[ELVQKEFTVQK]	>sp|Q12466	158	168	[DAKSSAESSNATNNNTLGTESK]	>sp|P38250	760	781	K162	T778	1	20150505_Debelyy_7439-d10x-5ul.20222.20222.3	6900.39	(L)
374	2	381	1237.95	3	3711.83	3711.82	3.56	[ELVQKEFTVQK]	>sp|Q12466	158	168	[DAKSSAESSNATNNNTLGTESK]	>sp|P38250	760	781	K162	S780	1	20150505_Debelyy_7439-d10x-5ul.20222.20222.3	6900.39	(L)
149	1	273	1251.96	3	3753.85	3753.84	3.08	[WENHSSVVNAK]	>sp|P38250	285	295	[RSIHEASYVGWKQIGGWEDK]	>sp|Q12466	58	77	S289	K69		20150415_Debelyy_7263_SCX-frct-75-2ul.17151.17151.3	2992.6	(L)
149	1	273	1251.96	3	3753.85	3753.84	3.08	[WENHSSVVNAK]	>sp|P38250	285	295	[RSIHEASYVGWKQIGGWEDK]	>sp|Q12466	58	77	S290	K69		20150415_Debelyy_7263_SCX-frct-75-2ul.17151.17151.3	2992.6	(L)
169	5	198	1251.96	3	3753.85	3753.84	3	[WENHSSVVNAK]	>sp|P38250	285	295	[RSIHEASYVGWKQIGGWEDK]	>sp|Q12466	58	77	S289	K69		20150415_Debelyy_7263_SCX-frct-50-2ul.20900.20900.3	2993.53	(L)
169	5	198	1251.96	3	3753.85	3753.84	3	[WENHSSVVNAK]	>sp|P38250	285	295	[RSIHEASYVGWKQIGGWEDK]	>sp|Q12466	58	77	S290	K69		20150415_Debelyy_7263_SCX-frct-50-2ul.20900.20900.3	2993.53	(L)
156	1	214	1251.96	3	3753.85	3753.84	3.3	[WENHSSVVNAK]	>sp|P38250	285	295	[RSIHEASYVGWKQIGGWEDK]	>sp|Q12466	58	77	S289	K69		20150415_Debelyy_7263_SCX-frct-125-2ul.14570.14570.3	2993.88	(L)
156	1	214	1251.96	3	3753.85	3753.84	3.3	[WENHSSVVNAK]	>sp|P38250	285	295	[RSIHEASYVGWKQIGGWEDK]	>sp|Q12466	58	77	S290	K69		20150415_Debelyy_7263_SCX-frct-125-2ul.14570.14570.3	2993.88	(L)
89	1	130	1251.96	3	3753.86	3753.84	4.51	[WENHSSVVNAK]	>sp|P38250	285	295	[RSIHEASYVGWKQIGGWEDK]	>sp|Q12466	58	77	S289	K69		20150415_Debelyy_7263_SCX-frct-FT-2ul.19266.19266.3	2992.13	(L)
89	1	130	1251.96	3	3753.86	3753.84	4.51	[WENHSSVVNAK]	>sp|P38250	285	295	[RSIHEASYVGWKQIGGWEDK]	>sp|Q12466	58	77	S290	K69		20150415_Debelyy_7263_SCX-frct-FT-2ul.19266.19266.3	2992.13	(L)
319	2	365	1271.29	3	3811.86	3811.86	0.74	[TGVVKAVDNDTAGSAGK]	>sp|P38250	691	707	[VENDYESLEWLNAFLDK]	>sp|Q12466	169	185	K695	Y173		20150415_Debelyy_7263_SCX-frct-50-2ul.20733.20733.3	2976.82	(L)
319	2	361	1271.29	3	3811.86	3811.86	0.74	[TGVVKAVDNDTAGSAGK]	>sp|P38250	691	707	[VENDYESLEWLNAFLDK]	>sp|Q12466	169	185	K695	S175		20150415_Debelyy_7263_SCX-frct-50-2ul.20733.20733.3	2976.82	(L)
319	1	410	1271.29	3	3811.86	3811.86	2.49	[TGVVKAVDNDTAGSAGK]	>sp|P38250	691	707	[VENDYESLEWLNAFLDK]	>sp|Q12466	169	185	K695	Y173		20150415_Debelyy_7263_SCX-frct-FT-2ul.19114.19114.3	2976.44	(L)
319	1	396	1271.29	3	3811.86	3811.86	2.49	[TGVVKAVDNDTAGSAGK]	>sp|P38250	691	707	[VENDYESLEWLNAFLDK]	>sp|Q12466	169	185	K695	S175		20150415_Debelyy_7263_SCX-frct-FT-2ul.19114.19114.3	2976.44	(L)
342	1	608	1498.68	2	2996.36	2996.36	-2.22	[YEPFWSDR]	>sp|P38250	177	184	[KDENDKYEETIDEK]	>sp|Q12466	750	763	Y177	K755		20150807_Debelyy-M-7678-25.9621.9621.2	2832.27	(H)
342	1	580	1498.68	2	2996.36	2996.36	-2.22	[YEPFWSDR]	>sp|P38250	177	184	[KDENDKYEETIDEK]	>sp|Q12466	750	763	Y177	K750		20150807_Debelyy-M-7678-25.9621.9621.2	2832.27	(H)
342	2	576	1498.68	2	2996.36	2996.36	-2.06	[YEPFWSDR]	>sp|P38250	177	184	[KDENDKYEETIDEK]	>sp|Q12466	750	763	Y177	K755		20150807_Debelyy-M-7678-25.9587.9587.2	2824.62	(H)
342	2	575	1498.68	2	2996.36	2996.36	-2.06	[YEPFWSDR]	>sp|P38250	177	184	[KDENDKYEETIDEK]	>sp|Q12466	750	763	Y177	K750		20150807_Debelyy-M-7678-25.9587.9587.2	2824.62	(H)
299	1	575	1498.68	2	2996.36	2996.36	-0.22	[YEPFWSDR]	>sp|P38250	177	184	[KDENDKYEETIDEK]	>sp|Q12466	750	763	S182	K755		20151202_Debelyy_7987-dil10x-6ul-140min.26723.26723.2	7369.27	(H)
299	1	561	1498.68	2	2996.36	2996.36	-0.22	[YEPFWSDR]	>sp|P38250	177	184	[KDENDKYEETIDEK]	>sp|Q12466	750	763	S182	K750		20151202_Debelyy_7987-dil10x-6ul-140min.26723.26723.2	7369.27	(H)
337	1	659	1499.69	2	2998.37	2998.36	2.66	[AVDNDTAGSAGK]	>sp|P38250	696	707	[KDENDKYEETIDEK]	>sp|Q12466	750	763	S704	K755		20141205_Debelyy_7182-d10x-140min.36366.36366.2	0]=6894.5976	(L)
337	1	655	1499.69	2	2998.37	2998.36	2.66	[AVDNDTAGSAGK]	>sp|P38250	696	707	[KDENDKYEETIDEK]	>sp|Q12466	750	763	T701	K755		20141205_Debelyy_7182-d10x-140min.36366.36366.2	0]=6894.5976	(L)
337	1	520	1499.69	2	2998.37	2998.36	2.66	[AVDNDTAGSAGK]	>sp|P38250	696	707	[KDENDKYEETIDEK]	>sp|Q12466	750	763	S704	K750		20141205_Debelyy_7182-d10x-140min.36366.36366.2	0]=6894.5976	(L)
337	1	513	1499.69	2	2998.37	2998.36	2.66	[AVDNDTAGSAGK]	>sp|P38250	696	707	[KDENDKYEETIDEK]	>sp|Q12466	750	763	T701	K750		20141205_Debelyy_7182-d10x-140min.36366.36366.2	0]=6894.5976	(L)
Ist2p-Tcb1p_BS3
Ions not to be considered for statistics are removed
FDR<0.05	Nr.	Score	m/z	z	M+H+	calc.	Dev.	Peptide(1)	Protein(1)	From(1)	To(1)	Peptide(2)	Protein(2)	From(1)	To(2)	Site(1)	Site(2)	Rank	Scan	RT	Misc.
128	2	173	423.759	4	1692.01	1692.01	2.37	[EDKAK]	>sp|Q12466	826	830	[HKKGLLHK]	>sp|P38250	934	941	K828	K936		20160201_Debelyy_8080-FT.26908.26908.4	7911.04	(H)
128	3	135	423.76	4	1692.02	1692.01	3.86	[EDKAK]	>sp|Q12466	826	830	[HKKGLLHK]	>sp|P38250	934	941	K828	K936		20160201_Debelyy_8080-FT.23694.23694.4	6963.95	(H)
266	1	424	512.948	3	1536.83	1536.84	-4.26	{MAK]	>sp|Q12466	1	3	[NGPSRSISTK]	>sp|P38250	862	871	{0	S867		20160201_Debelyy_8080-SCX6.18884.18884.3	4438.84	(H)
299	3	314	548.542	4	2191.15	2191.14	2.91	[TDFK]	>sp|Q12466	695	698	[HRDAGVKNVTNNSK]	>sp|P38250	904	917	T695	K910	1	20151202_Debelyy_7987-dil10x-6ul-140min.12232.12232.4	3919.66	(H)
169	6	243	572.552	4	2287.18	2287.19	-4.33	[KYRGSIR]	>sp|Q12466	151	157	[WENHSSVVNAK]	>sp|P38250	285	295	K151	S290		20150415_Debelyy_7263_SCX-frct-50-2ul.5417.5417.4	1523.47	(L)
228	1	232	584.316	4	2334.24	2334.25	-2.25	[LEPPKTK]	>sp|Q12466	28	34	[FDEDGKSIRDAK]	>sp|P38250	751	762	T33	K756		20150828_Debelyy_7720-d20x-1ul-140min.23931.23931.4	7050.61	(H)
169	8	177	861.802	3	2583.39	2583.4	-1.56	[FFPTLEEKK]	>sp|Q12466	506	514	[KTEVSTKNGPSR]	>sp|P38250	855	866	K513	T860	1	20150415_Debelyy_7263_SCX-frct-50-2ul.20170.20170.3	2919.02	(H)
202	1	294	883.128	3	2647.37	2647.36	2.72	[TTQR]	>sp|Q12466	481	484	[IPSPEFNSNNEKELVQR]	>sp|P38250	619	635	T481	K630	1	20150505_Debelyy_7441-2ul.21178.21178.3	6847.74	(H)
376	1	454	892.989	2	1784.97	1784.97	-3.07	[QKAQKK]	>sp|P38250	201	206	[EDTGVTAPK]	>sp|Q12466	4	12	K205	T9		20150730_Debelyy-M-7663-elu-dil10x-4ul-140min.32422.32422.2	6950.19	(L)
425	1	465	943.108	3	2827.31	2827.32	-2.08	[KPLATESTEK]	>sp|P38250	708	717	[YYINNEEDJAYK]	>sp|Q12466	1019	1030	K708	Y1029		20160201_Debelyy_8080-SCX5.28829.28829.3	6379.57	(H)
299	4	308	953.126	3	2857.36	2857.37	-2.69	[KKL}	>sp|P38250	944	947	[FDQEWNEVKELEDMYSNR]	>sp|Q12466	831	848	K945	K839	1	20151202_Debelyy_7987-dil10x-6ul-140min.25614.25614.3	7102.72	(L)
169	7	180	994.519	3	2981.54	2981.55	-4.15	[DAGVKNVTNNSK]	>sp|P38250	906	917	[KPETAQVANINGIDK]	>sp|Q12466	13	27	K910	K13		20150415_Debelyy_7263_SCX-frct-50-2ul.19910.19910.3	2893.84	(L)
169	7	169	994.519	3	2981.54	2981.55	-4.15	[DAGVKNVTNNSK]	>sp|P38250	906	917	[KPETAQVANINGIDK]	>sp|Q12466	13	27	S916	K13		20150415_Debelyy_7263_SCX-frct-50-2ul.19910.19910.3	2893.84	(L)
298	1	310	999.462	3	2996.37	2996.36	2.93	[YEPFWSDR]	>sp|P38250	177	184	[KDENDKYEETIDEK]	>sp|Q12466	750	763	Y177	K755	1	20150421_Debelyy_7438-d10x-5ul-140min.21480.21480.3	6908.12	(H)
374	2	383	1237.95	3	3711.83	3711.82	3.56	[ELVQKEFTVQK]	>sp|Q12466	158	168	[DAKSSAESSNATNNNTLGTESK]	>sp|P38250	760	781	K162	T775	1	20150505_Debelyy_7439-d10x-5ul.20222.20222.3	6900.39	(L)
149	1	273	1251.96	3	3753.85	3753.84	3.08	[WENHSSVVNAK]	>sp|P38250	285	295	[RSIHEASYVGWKQIGGWEDK]	>sp|Q12466	58	77	S289	K69		20150415_Debelyy_7263_SCX-frct-75-2ul.17151.17151.3	2992.6	(L)
169	5	198	1251.96	3	3753.85	3753.84	3	[WENHSSVVNAK]	>sp|P38250	285	295	[RSIHEASYVGWKQIGGWEDK]	>sp|Q12466	58	77	S289	K69		20150415_Debelyy_7263_SCX-frct-50-2ul.20900.20900.3	2993.53	(L)
156	1	214	1251.96	3	3753.85	3753.84	3.3	[WENHSSVVNAK]	>sp|P38250	285	295	[RSIHEASYVGWKQIGGWEDK]	>sp|Q12466	58	77	S289	K69		20150415_Debelyy_7263_SCX-frct-125-2ul.14570.14570.3	2993.88	(L)
89	1	130	1251.96	3	3753.86	3753.84	4.51	[WENHSSVVNAK]	>sp|P38250	285	295	[RSIHEASYVGWKQIGGWEDK]	>sp|Q12466	58	77	S289	K69		20150415_Debelyy_7263_SCX-frct-FT-2ul.19266.19266.3	2992.13	(L)
319	2	365	1271.29	3	3811.86	3811.86	0.74	[TGVVKAVDNDTAGSAGK]	>sp|P38250	691	707	[VENDYESLEWLNAFLDK]	>sp|Q12466	169	185	K695	Y173		20150415_Debelyy_7263_SCX-frct-50-2ul.20733.20733.3	2976.82	(L)
319	1	410	1271.29	3	3811.86	3811.86	2.49	[TGVVKAVDNDTAGSAGK]	>sp|P38250	691	707	[VENDYESLEWLNAFLDK]	>sp|Q12466	169	185	K695	Y173		20150415_Debelyy_7263_SCX-frct-FT-2ul.19114.19114.3	2976.44	(L)
342	1	608	1498.68	2	2996.36	2996.36	-2.22	[YEPFWSDR]	>sp|P38250	177	184	[KDENDKYEETIDEK]	>sp|Q12466	750	763	Y177	K755		20150807_Debelyy-M-7678-25.9621.9621.2	2832.27	(H)
342	2	576	1498.68	2	2996.36	2996.36	-2.06	[YEPFWSDR]	>sp|P38250	177	184	[KDENDKYEETIDEK]	>sp|Q12466	750	763	Y177	K755		20150807_Debelyy-M-7678-25.9587.9587.2	2824.62	(H)
299	1	575	1498.68	2	2996.36	2996.36	-0.22	[YEPFWSDR]	>sp|P38250	177	184	[KDENDKYEETIDEK]	>sp|Q12466	750	763	S182	K755		20151202_Debelyy_7987-dil10x-6ul-140min.26723.26723.2	7369.27	(H)
337	1	659	1499.69	2	2998.37	2998.36	2.66	[AVDNDTAGSAGK]	>sp|P38250	696	707	[KDENDKYEETIDEK]	>sp|Q12466	750	763	S704	K755		20141205_Debelyy_7182-d10x-140min.36366.36366.2	0]=6894.5976	(L)
								Number of amino acids in peptide 1				Number of amino acids in peptide 2
								5				8
								5				8
								3				10
								4				14
								7				11
								7				12
								9				12
								4				17
								6				9
								10				12
								4				18
								12				15
								12				15
								8				14
								11				22
								11				20
								11				20
								11				20
								11				20
								17				17
								17				17
								8				14
								8				14
								8				14
								12				14
Ist2p-Tcb1p_EDC
FDR<0.05	Nr.	Score	m/z	z	M+H+	calc.	Dev.	Peptide(1)	Protein(1)	From(1)	To(1)	Peptide(2)	Protein(2)	From(1)	To(2)	Site(1)	Site(2)	Rank	Scan	RT
315	2	428	843.981	2	1686.95	1686.95	0.46	[EKPK]	>sp|P38250	930	933	[VFIEKANDLR]	>sp|Q12466	662	671	E930	K666	1	20160201_Debelyy_8078-SCX7.32175.32175.2	7082.73
315	4	334	539.6	3	1616.79	1616.79	0.79	{mAK]	>sp|Q12466	0	3	[WENHSSVVNAK]	>sp|P38250	285	295	{0	E286		20160201_Debelyy_8078-SCX4.27771.27771.3	6042.87
270	1	296	592.323	4	2366.27	2366.27	-0.83	[TTESSSSSSAAK]	>sp|P38250	918	929	[AKVGRLVmPKK]	>sp|Q12466	764	774	E920	K765	1	20150922_Debelyy_7780-dil10x-2ul-140min.15056.15056.4	4346.68
305	2	343	1027.56	3	3080.67	3080.67	0.15	[AKVGRLVMPK]	>sp|Q12466	764	773	[IPSPEFNSNNEKELVQR]	>sp|P38250	619	635	K765	E631	1	23548	6729
305	2	320	1027.56	3	3080.67	3080.67	0.15	[AKVGRLVMPK]	>sp|Q12466	764	773	[IPSPEFNSNNEKELVQR]	>sp|P38250	619	635	K765	E629	1	23548	6729
305	2	309	1027.56	3	3080.67	3080.67	0.15	[AKVGRLVMPK]	>sp|Q12466	764	773	[IPSPEFNSNNEKELVQR]	>sp|P38250	619	635	K765	E623	1	23548	6729
225	1	334	539.6	3	1616.79	1616.79	0.79	{mAK]	>sp|Q12466	0	3	[WENHSSVVNAK]	>sp|P38250	285	295	{0	E286		20160201_Debelyy_8078-SCX4.27771.27771.3	6042.87
225	2	310	660.835	2	1320.66	1320.66	-0.5	[DDAATK]	>sp|P38250	817	822	[ISKEDK]	>sp|Q12466	823	828	D817	K825		20160201_Debelyy_8078-SCX4.7523.7523.2	2171.06
225	2	310	660.835	2	1320.66	1320.66	-0.5	[DDAATK]	>sp|P38250	817	822	[ISKEDK]	>sp|Q12466	823	828	D818	K825		20160201_Debelyy_8078-SCX4.7523.7523.2	2171.06
225	4	238	605.019	3	1813.04	1813.04	1.82	[GLKR]	>sp|Q12466	397	400	[ELVQRKGSANEK]	>sp|P38250	631	642	K399	E631		20160201_Debelyy_8078-SCX4.25521.25521.3	5554.06
235	1	249	1027.56	3	3080.67	3080.67	0.02	[AKVGRLVMPK]	>sp|Q12466	764	773	[IPSPEFNSNNEKELVQR]	>sp|P38250	619	635	K765	E631		20160201_Debelyy_8078-SCX6.27639.27639.3	6264.31
235	1	240	1027.56	3	3080.67	3080.67	0.02	[AKVGRLVMPK]	>sp|Q12466	764	773	[IPSPEFNSNNEKELVQR]	>sp|P38250	619	635	K765	E623		20160201_Debelyy_8078-SCX6.27639.27639.3	6264.31
235	1	240	1027.56	3	3080.67	3080.67	0.02	[AKVGRLVMPK]	>sp|Q12466	764	773	[IPSPEFNSNNEKELVQR]	>sp|P38250	619	635	K765	E629		20160201_Debelyy_8078-SCX6.27639.27639.3	6264.31
251	1	428	843.981	2	1686.95	1686.95	0.46	[EKPK]	>sp|P38250	930	933	[VFIEKANDLR]	>sp|Q12466	662	671	E930	K666	1	20160201_Debelyy_8078-SCX7.32175.32175.2	7082.73
316	2	333	1027.56	3	3080.67	3080.67	1.9	[AKVGRLVMPK]	>sp|Q12466	764	773	[IPSPEFNSNNEKELVQR]	>sp|P38250	619	635	K765	E631	1	20151202_Debelyy_7988-dil10x-6ul-140min.23596.23596.3	6735.56
Ist2p-Tcb1p_EDC
Ions from a single experiment or merged file that were just interpreted in different ways are counted only once; lines not to be considered for the statistics are in light grey
FDR<0.05	Nr.	Score	m/z	z	M+H+	calc.	Dev.	Peptide(1)	Protein(1)	From(1)	To(1)	Peptide(2)	Protein(2)	From(1)	To(2)	Site(1)	Site(2)	Rank	Scan	RT
315	4	334	539.6	3	1616.79	1616.79	0.79	{mAK]	>sp|Q12466	1	3	[WENHSSVVNAK]	>sp|P38250	285	295	{0	E286		20160201_Debelyy_8078-SCX4.27771.27771.3	6042.87
225	1	334	539.6	3	1616.79	1616.79	0.79	{mAK]	>sp|Q12466	1	3	[WENHSSVVNAK]	>sp|P38250	285	295	{0	E286		20160201_Debelyy_8078-SCX4.27771.27771.3	6042.87
270	1	296	592.323	4	2366.27	2366.27	-0.83	[TTESSSSSSAAK]	>sp|P38250	918	929	[AKVGRLVmPKK]	>sp|Q12466	764	774	E920	K765	1	20150922_Debelyy_7780-dil10x-2ul-140min.15056.15056.4	4346.68
225	4	238	605.019	3	1813.04	1813.04	1.82	[GLKR]	>sp|Q12466	397	400	[ELVQRKGSANEK]	>sp|P38250	631	642	K399	E631		20160201_Debelyy_8078-SCX4.25521.25521.3	5554.06
225	2	310	660.835	2	1320.66	1320.66	-0.5	[DDAATK]	>sp|P38250	817	822	[ISKEDK]	>sp|Q12466	823	828	D817	K825		20160201_Debelyy_8078-SCX4.7523.7523.2	2171.06
225	2	310	660.835	2	1320.66	1320.66	-0.5	[DDAATK]	>sp|P38250	817	822	[ISKEDK]	>sp|Q12466	823	828	D818	K825		20160201_Debelyy_8078-SCX4.7523.7523.2	2171.06
315	2	428	843.981	2	1686.95	1686.95	0.46	[EKPK]	>sp|P38250	930	933	[VFIEKANDLR]	>sp|Q12466	662	671	E930	K666	1	20160201_Debelyy_8078-SCX7.32175.32175.2	7082.73
251	1	428	843.981	2	1686.95	1686.95	0.46	[EKPK]	>sp|P38250	930	933	[VFIEKANDLR]	>sp|Q12466	662	671	E930	K666	1	20160201_Debelyy_8078-SCX7.32175.32175.2	7082.73
235	1	249	1027.56	3	3080.67	3080.67	0.02	[AKVGRLVMPK]	>sp|Q12466	764	773	[IPSPEFNSNNEKELVQR]	>sp|P38250	619	635	K765	E631		20160201_Debelyy_8078-SCX6.27639.27639.3	6264.31
235	1	240	1027.56	3	3080.67	3080.67	0.02	[AKVGRLVMPK]	>sp|Q12466	764	773	[IPSPEFNSNNEKELVQR]	>sp|P38250	619	635	K765	E623		20160201_Debelyy_8078-SCX6.27639.27639.3	6264.31
235	1	240	1027.56	3	3080.67	3080.67	0.02	[AKVGRLVMPK]	>sp|Q12466	764	773	[IPSPEFNSNNEKELVQR]	>sp|P38250	619	635	K765	E629		20160201_Debelyy_8078-SCX6.27639.27639.3	6264.31
305	2	343	1027.56	3	3080.67	3080.67	0.15	[AKVGRLVMPK]	>sp|Q12466	764	773	[IPSPEFNSNNEKELVQR]	>sp|P38250	619	635	K765	E631	1	23548	6729
305	2	320	1027.56	3	3080.67	3080.67	0.15	[AKVGRLVMPK]	>sp|Q12466	764	773	[IPSPEFNSNNEKELVQR]	>sp|P38250	619	635	K765	E629	1	23548	6729
305	2	309	1027.56	3	3080.67	3080.67	0.15	[AKVGRLVMPK]	>sp|Q12466	764	773	[IPSPEFNSNNEKELVQR]	>sp|P38250	619	635	K765	E623	1	23548	6729
316	2	333	1027.56	3	3080.67	3080.67	1.9	[AKVGRLVMPK]	>sp|Q12466	764	773	[IPSPEFNSNNEKELVQR]	>sp|P38250	619	635	K765	E631	1	20151202_Debelyy_7988-dil10x-6ul-140min.23596.23596.3	6735.56
Ist2p-Tcb1p_EDC
Ions not to be considered for statistics are removed
FDR<0.05	Nr.	Score	m/z	z	M+H+	calc.	Dev.	Peptide(1)	Protein(1)	From(1)	To(1)	Peptide(2)	Protein(2)	From(1)	To(2)	Site(1)	Site(2)	Rank	Scan	RT
315	4	334	539.6	3	1616.79	1616.79	0.79	{mAK]	>sp|Q12466	1	3	[WENHSSVVNAK]	>sp|P38250	285	295	{0	E286		20160201_Debelyy_8078-SCX4.27771.27771.3	6042.87
270	1	296	592.323	4	2366.27	2366.27	-0.83	[TTESSSSSSAAK]	>sp|P38250	918	929	[AKVGRLVmPKK]	>sp|Q12466	764	774	E920	K765	1	20150922_Debelyy_7780-dil10x-2ul-140min.15056.15056.4	4346.68
225	4	238	605.019	3	1813.04	1813.04	1.82	[GLKR]	>sp|Q12466	397	400	[ELVQRKGSANEK]	>sp|P38250	631	642	K399	E631		20160201_Debelyy_8078-SCX4.25521.25521.3	5554.06
225	2	310	660.835	2	1320.66	1320.66	-0.5	[DDAATK]	>sp|P38250	817	822	[ISKEDK]	>sp|Q12466	823	828	D817	K825		20160201_Debelyy_8078-SCX4.7523.7523.2	2171.06
315	2	428	843.981	2	1686.95	1686.95	0.46	[EKPK]	>sp|P38250	930	933	[VFIEKANDLR]	>sp|Q12466	662	671	E930	K666	1	20160201_Debelyy_8078-SCX7.32175.32175.2	7082.73
235	1	249	1027.56	3	3080.67	3080.67	0.02	[AKVGRLVMPK]	>sp|Q12466	764	773	[IPSPEFNSNNEKELVQR]	>sp|P38250	619	635	K765	E631		20160201_Debelyy_8078-SCX6.27639.27639.3	6264.31
305	2	343	1027.56	3	3080.67	3080.67	0.15	[AKVGRLVMPK]	>sp|Q12466	764	773	[IPSPEFNSNNEKELVQR]	>sp|P38250	619	635	K765	E631	1	23548	6729
316	2	333	1027.56	3	3080.67	3080.67	1.9	[AKVGRLVMPK]	>sp|Q12466	764	773	[IPSPEFNSNNEKELVQR]	>sp|P38250	619	635	K765	E631	1	20151202_Debelyy_7988-dil10x-6ul-140min.23596.23596.3	6735.56
								Number of amino acids in peptide 1				Number of amino acids in peptide 2
								3				11
								12				11
								4				12
								6				6
								4				10
								10				17
								10				17
								10				17

## Sheet: Pma1p-Pma2p
Pma1p-Pma2p_BS3
FDR<0.05	Nr.	Score	m/z	z	M+H+	calc.	Dev.	Peptide(1)	Protein(1)	From(1)	To(1)	Peptide(2)	Protein(2)	From(1)	To(2)	Site(1)	Site(2)	Rank	Scan	RT	Misc.
168	7	174	960.161	3	2878.47	2878.47	-0.28	[LmNGKPmK]	>sp|P05030	885	892	[DDTAQTINEARNLGLR]	>sp|P19657	567	582	K889	T569		20160201_Debelyy_8080-SCX7.29739.29739.3	6650.19	(H)
168	7	174	960.161	3	2878.47	2878.47	-0.28	[LmNGKPmK]	>sp|P05030	885	892	[DDTAQTINEARNLGLR]	>sp|P19657	567	582	K889	T572		20160201_Debelyy_8080-SCX7.29739.29739.3	6650.19	(H)
77	4	186	760.388	5	3797.91	3797.9	1.95	[QYKEKPSK]	>sp|P19657	8	15	[IVTEDJFLQIDQSAITGESLAVDK]	>sp|P05030	216	239	K10	T231	1	20150415_Debelyy_7263_SCX-frct-300-2ul.10247.10247.5	2770.94	(L)
77	4	185	760.388	5	3797.91	3797.9	1.95	[QYKEKPSK]	>sp|P19657	8	15	[IVTEDJFLQIDQSAITGESLAVDK]	>sp|P05030	216	239	K12	T231	1	20150415_Debelyy_7263_SCX-frct-300-2ul.10247.10247.5	2770.94	(L)
77	4	178	760.388	5	3797.91	3797.9	1.95	[QYKEKPSK]	>sp|P19657	8	15	[IVTEDJFLQIDQSAITGESLAVDK]	>sp|P05030	216	239	K10	S228	1	20150415_Debelyy_7263_SCX-frct-300-2ul.10247.10247.5	2770.94	(L)
77	4	176	760.388	5	3797.91	3797.9	1.95	[QYKEKPSK]	>sp|P19657	8	15	[IVTEDJFLQIDQSAITGESLAVDK]	>sp|P05030	216	239	K12	S228	1	20150415_Debelyy_7263_SCX-frct-300-2ul.10247.10247.5	2770.94	(L)
77	4	127	760.388	5	3797.91	3797.9	1.95	[QYKEKPSK]	>sp|P19657	8	15	[IVTEDJFLQIDQSAITGESLAVDK]	>sp|P05030	216	239	K10	T218	1	20150415_Debelyy_7263_SCX-frct-300-2ul.10247.10247.5	2770.94	(L)
77	4	125	760.388	5	3797.91	3797.9	1.95	[QYKEKPSK]	>sp|P19657	8	15	[IVTEDJFLQIDQSAITGESLAVDK]	>sp|P05030	216	239	K12	T218	1	20150415_Debelyy_7263_SCX-frct-300-2ul.10247.10247.5	2770.94	(L)
184	2	323	1128.1	2	2255.19	2255.19	1.74	[VSTQHEKET}	>sp|P05030	910	919	[TLANTATVIR]	>sp|P19657	204	213	K916	T204		20150730_Debelyy-G-7664-elu-dil10x-4ul-140min.33923.33923.2	7127.09	(L)
184	2	323	1128.1	2	2255.19	2255.19	1.74	[VSTQHEKET}	>sp|P05030	910	919	[TLANTATVIR]	>sp|P19657	204	213	K916	T208		20150730_Debelyy-G-7664-elu-dil10x-4ul-140min.33923.33923.2	7127.09	(L)
184	2	228	1128.1	2	2255.19	2255.19	1.74	[VSTQHEKET}	>sp|P05030	910	919	[TLANTATVIR]	>sp|P19657	204	213	K916	T210		20150730_Debelyy-G-7664-elu-dil10x-4ul-140min.33923.33923.2	7127.09	(L)
184	3	298	960.162	3	2878.47	2878.47	0.9	[LmNGKPmK]	>sp|P05030	885	892	[DDTAQTINEARNLGLR]	>sp|P19657	567	582	K889	T572		20150730_Debelyy-G-7664-elu-dil10x-4ul-140min.31157.31157.3	6636.55	(H)
184	3	267	960.162	3	2878.47	2878.47	0.9	[LmNGKPmK]	>sp|P05030	885	892	[DDTAQTINEARNLGLR]	>sp|P19657	567	582	K889	T569		20150730_Debelyy-G-7664-elu-dil10x-4ul-140min.31157.31157.3	6636.55	(H)
150	2	174	960.161	3	2878.47	2878.47	-0.28	[LmNGKPmK]	>sp|P05030	885	892	[DDTAQTINEARNLGLR]	>sp|P19657	567	582	K889	T569		20160201_Debelyy_8080-SCX7.29739.29739.3	6650.19	(H)
150	2	174	960.161	3	2878.47	2878.47	-0.28	[LmNGKPmK]	>sp|P05030	885	892	[DDTAQTINEARNLGLR]	>sp|P19657	567	582	K889	T572		20160201_Debelyy_8080-SCX7.29739.29739.3	6650.19	(H)
157	7	238	1098.89	3	3294.64	3294.63	3.08	[LMNGKPmKEK]	>sp|P05030	885	894	[DLSTDPAYGLTSDEVARR]	>sp|P19657	108	125	K889	T118	1	20150421_Debelyy_7438-d10x-5ul-140min.21510.21510.3	6916.61	(L)
157	7	238	1098.89	3	3294.64	3294.63	3.08	[LMNGKPmKEK]	>sp|P05030	885	894	[DLSTDPAYGLTSDEVARR]	>sp|P19657	108	125	K889	S119	1	20150421_Debelyy_7438-d10x-5ul-140min.21510.21510.3	6916.61	(L)
157	7	238	1098.89	3	3294.64	3294.63	3.08	[LMNGKPmKEK]	>sp|P05030	885	894	[DLSTDPAYGLTSDEVARR]	>sp|P19657	108	125	K892	T118	1	20150421_Debelyy_7438-d10x-5ul-140min.21510.21510.3	6916.61	(L)
157	7	238	1098.89	3	3294.64	3294.63	3.08	[LMNGKPmKEK]	>sp|P05030	885	894	[DLSTDPAYGLTSDEVARR]	>sp|P19657	108	125	K892	S119	1	20150421_Debelyy_7438-d10x-5ul-140min.21510.21510.3	6916.61	(L)
157	7	200	1098.89	3	3294.64	3294.63	3.08	[LMNGKPmKEK]	>sp|P05030	885	894	[DLSTDPAYGLTSDEVARR]	>sp|P19657	108	125	K889	Y115	1	20150421_Debelyy_7438-d10x-5ul-140min.21510.21510.3	6916.61	(L)
157	7	200	1098.89	3	3294.64	3294.63	3.08	[LMNGKPmKEK]	>sp|P05030	885	894	[DLSTDPAYGLTSDEVARR]	>sp|P19657	108	125	K892	Y115	1	20150421_Debelyy_7438-d10x-5ul-140min.21510.21510.3	6916.61	(L)
157	7	197	1098.89	3	3294.64	3294.63	3.08	[LMNGKPmKEK]	>sp|P05030	885	894	[DLSTDPAYGLTSDEVARR]	>sp|P19657	108	125	K889	S110	1	20150421_Debelyy_7438-d10x-5ul-140min.21510.21510.3	6916.61	(L)
157	7	197	1098.89	3	3294.64	3294.63	3.08	[LMNGKPmKEK]	>sp|P05030	885	894	[DLSTDPAYGLTSDEVARR]	>sp|P19657	108	125	K892	S110	1	20150421_Debelyy_7438-d10x-5ul-140min.21510.21510.3	6916.61	(L)
157	7	197	1098.89	3	3294.64	3294.63	3.08	[LMNGKPmKEK]	>sp|P05030	885	894	[DLSTDPAYGLTSDEVARR]	>sp|P19657	108	125	K892	T111	1	20150421_Debelyy_7438-d10x-5ul-140min.21510.21510.3	6916.61	(L)
157	7	196	1098.89	3	3294.64	3294.63	3.08	[LMNGKPmKEK]	>sp|P05030	885	894	[DLSTDPAYGLTSDEVARR]	>sp|P19657	108	125	K889	T111	1	20150421_Debelyy_7438-d10x-5ul-140min.21510.21510.3	6916.61	(L)
157	8	238	1098.89	3	3294.64	3294.63	3.08	[LmNGKPMKEK]	>sp|P05030	885	894	[DLSTDPAYGLTSDEVARR]	>sp|P19657	108	125	K889	T118	2	20150421_Debelyy_7438-d10x-5ul-140min.21510.21510.3	6916.61	(L)
157	8	238	1098.89	3	3294.64	3294.63	3.08	[LmNGKPMKEK]	>sp|P05030	885	894	[DLSTDPAYGLTSDEVARR]	>sp|P19657	108	125	K889	S119	2	20150421_Debelyy_7438-d10x-5ul-140min.21510.21510.3	6916.61	(L)
157	8	238	1098.89	3	3294.64	3294.63	3.08	[LmNGKPMKEK]	>sp|P05030	885	894	[DLSTDPAYGLTSDEVARR]	>sp|P19657	108	125	K892	T118	2	20150421_Debelyy_7438-d10x-5ul-140min.21510.21510.3	6916.61	(L)
157	8	238	1098.89	3	3294.64	3294.63	3.08	[LmNGKPMKEK]	>sp|P05030	885	894	[DLSTDPAYGLTSDEVARR]	>sp|P19657	108	125	K892	S119	2	20150421_Debelyy_7438-d10x-5ul-140min.21510.21510.3	6916.61	(L)
157	8	212	1098.89	3	3294.64	3294.63	3.08	[LmNGKPMKEK]	>sp|P05030	885	894	[DLSTDPAYGLTSDEVARR]	>sp|P19657	108	125	K889	Y115	2	20150421_Debelyy_7438-d10x-5ul-140min.21510.21510.3	6916.61	(L)
157	8	209	1098.89	3	3294.64	3294.63	3.08	[LmNGKPMKEK]	>sp|P05030	885	894	[DLSTDPAYGLTSDEVARR]	>sp|P19657	108	125	K889	S110	2	20150421_Debelyy_7438-d10x-5ul-140min.21510.21510.3	6916.61	(L)
157	8	209	1098.89	3	3294.64	3294.63	3.08	[LmNGKPMKEK]	>sp|P05030	885	894	[DLSTDPAYGLTSDEVARR]	>sp|P19657	108	125	K889	T111	2	20150421_Debelyy_7438-d10x-5ul-140min.21510.21510.3	6916.61	(L)
157	8	206	1098.89	3	3294.64	3294.63	3.08	[LmNGKPMKEK]	>sp|P05030	885	894	[DLSTDPAYGLTSDEVARR]	>sp|P19657	108	125	K892	Y115	2	20150421_Debelyy_7438-d10x-5ul-140min.21510.21510.3	6916.61	(L)
157	8	202	1098.89	3	3294.64	3294.63	3.08	[LmNGKPMKEK]	>sp|P05030	885	894	[DLSTDPAYGLTSDEVARR]	>sp|P19657	108	125	K892	S110	2	20150421_Debelyy_7438-d10x-5ul-140min.21510.21510.3	6916.61	(L)
157	8	202	1098.89	3	3294.64	3294.63	3.08	[LmNGKPMKEK]	>sp|P05030	885	894	[DLSTDPAYGLTSDEVARR]	>sp|P19657	108	125	K892	T111	2	20150421_Debelyy_7438-d10x-5ul-140min.21510.21510.3	6916.61	(L)
150	15	175	1253.95	3	3759.84	3759.85	-4.47	[VKmLTGDAVGIAK]	>sp|P05030	554	566	[SVEDFmAAmQRVSTQHEKSS}	>sp|P19657	928	948	K555	S928	1	20150421_Debelyy_7438-d10x-5ul-140min.21695.21695.3	6968.34	(H)
Pma1p-Pma2p_BS3
Ions from a single experiment or merged file that were just interpreted in different ways are counted only once; lines not to be considered for the statistics are in light grey
FDR<0.05	Nr.	Score	m/z	z	M+H+	calc.	Dev.	Peptide(1)	Protein(1)	From(1)	To(1)	Peptide(2)	Protein(2)	From(1)	To(2)	Site(1)	Site(2)	Rank	Scan	RT	Misc.
77	4	186	760.388	5	3797.91	3797.9	1.95	[QYKEKPSK]	>sp|P19657	8	15	[IVTEDJFLQIDQSAITGESLAVDK]	>sp|P05030	216	239	K10	T231	1	20150415_Debelyy_7263_SCX-frct-300-2ul.10247.10247.5	2770.94	(L)
77	4	185	760.388	5	3797.91	3797.9	1.95	[QYKEKPSK]	>sp|P19657	8	15	[IVTEDJFLQIDQSAITGESLAVDK]	>sp|P05030	216	239	K12	T231	1	20150415_Debelyy_7263_SCX-frct-300-2ul.10247.10247.5	2770.94	(L)
77	4	178	760.388	5	3797.91	3797.9	1.95	[QYKEKPSK]	>sp|P19657	8	15	[IVTEDJFLQIDQSAITGESLAVDK]	>sp|P05030	216	239	K10	S228	1	20150415_Debelyy_7263_SCX-frct-300-2ul.10247.10247.5	2770.94	(L)
77	4	176	760.388	5	3797.91	3797.9	1.95	[QYKEKPSK]	>sp|P19657	8	15	[IVTEDJFLQIDQSAITGESLAVDK]	>sp|P05030	216	239	K12	S228	1	20150415_Debelyy_7263_SCX-frct-300-2ul.10247.10247.5	2770.94	(L)
77	4	127	760.388	5	3797.91	3797.9	1.95	[QYKEKPSK]	>sp|P19657	8	15	[IVTEDJFLQIDQSAITGESLAVDK]	>sp|P05030	216	239	K10	T218	1	20150415_Debelyy_7263_SCX-frct-300-2ul.10247.10247.5	2770.94	(L)
77	4	125	760.388	5	3797.91	3797.9	1.95	[QYKEKPSK]	>sp|P19657	8	15	[IVTEDJFLQIDQSAITGESLAVDK]	>sp|P05030	216	239	K12	T218	1	20150415_Debelyy_7263_SCX-frct-300-2ul.10247.10247.5	2770.94	(L)
168	7	174	960.161	3	2878.47	2878.47	-0.28	[LmNGKPmK]	>sp|P05030	885	892	[DDTAQTINEARNLGLR]	>sp|P19657	567	582	K889	T569		20160201_Debelyy_8080-SCX7.29739.29739.3	6650.19	(H)
168	7	174	960.161	3	2878.47	2878.47	-0.28	[LmNGKPmK]	>sp|P05030	885	892	[DDTAQTINEARNLGLR]	>sp|P19657	567	582	K889	T572		20160201_Debelyy_8080-SCX7.29739.29739.3	6650.19	(H)
150	2	174	960.161	3	2878.47	2878.47	-0.28	[LmNGKPmK]	>sp|P05030	885	892	[DDTAQTINEARNLGLR]	>sp|P19657	567	582	K889	T569		20160201_Debelyy_8080-SCX7.29739.29739.3	6650.19	(H)
150	2	174	960.161	3	2878.47	2878.47	-0.28	[LmNGKPmK]	>sp|P05030	885	892	[DDTAQTINEARNLGLR]	>sp|P19657	567	582	K889	T572		20160201_Debelyy_8080-SCX7.29739.29739.3	6650.19	(H)
184	3	298	960.162	3	2878.47	2878.47	0.9	[LmNGKPmK]	>sp|P05030	885	892	[DDTAQTINEARNLGLR]	>sp|P19657	567	582	K889	T572		20150730_Debelyy-G-7664-elu-dil10x-4ul-140min.31157.31157.3	6636.55	(H)
184	3	267	960.162	3	2878.47	2878.47	0.9	[LmNGKPmK]	>sp|P05030	885	892	[DDTAQTINEARNLGLR]	>sp|P19657	567	582	K889	T569		20150730_Debelyy-G-7664-elu-dil10x-4ul-140min.31157.31157.3	6636.55	(H)
157	7	238	1098.89	3	3294.64	3294.63	3.08	[LMNGKPmKEK]	>sp|P05030	885	894	[DLSTDPAYGLTSDEVARR]	>sp|P19657	108	125	K889	T118	1	20150421_Debelyy_7438-d10x-5ul-140min.21510.21510.3	6916.61	(L)
157	7	238	1098.89	3	3294.64	3294.63	3.08	[LMNGKPmKEK]	>sp|P05030	885	894	[DLSTDPAYGLTSDEVARR]	>sp|P19657	108	125	K889	S119	1	20150421_Debelyy_7438-d10x-5ul-140min.21510.21510.3	6916.61	(L)
157	7	238	1098.89	3	3294.64	3294.63	3.08	[LMNGKPmKEK]	>sp|P05030	885	894	[DLSTDPAYGLTSDEVARR]	>sp|P19657	108	125	K892	T118	1	20150421_Debelyy_7438-d10x-5ul-140min.21510.21510.3	6916.61	(L)
157	7	238	1098.89	3	3294.64	3294.63	3.08	[LMNGKPmKEK]	>sp|P05030	885	894	[DLSTDPAYGLTSDEVARR]	>sp|P19657	108	125	K892	S119	1	20150421_Debelyy_7438-d10x-5ul-140min.21510.21510.3	6916.61	(L)
157	7	200	1098.89	3	3294.64	3294.63	3.08	[LMNGKPmKEK]	>sp|P05030	885	894	[DLSTDPAYGLTSDEVARR]	>sp|P19657	108	125	K889	Y115	1	20150421_Debelyy_7438-d10x-5ul-140min.21510.21510.3	6916.61	(L)
157	7	200	1098.89	3	3294.64	3294.63	3.08	[LMNGKPmKEK]	>sp|P05030	885	894	[DLSTDPAYGLTSDEVARR]	>sp|P19657	108	125	K892	Y115	1	20150421_Debelyy_7438-d10x-5ul-140min.21510.21510.3	6916.61	(L)
157	7	197	1098.89	3	3294.64	3294.63	3.08	[LMNGKPmKEK]	>sp|P05030	885	894	[DLSTDPAYGLTSDEVARR]	>sp|P19657	108	125	K889	S110	1	20150421_Debelyy_7438-d10x-5ul-140min.21510.21510.3	6916.61	(L)
157	7	197	1098.89	3	3294.64	3294.63	3.08	[LMNGKPmKEK]	>sp|P05030	885	894	[DLSTDPAYGLTSDEVARR]	>sp|P19657	108	125	K892	S110	1	20150421_Debelyy_7438-d10x-5ul-140min.21510.21510.3	6916.61	(L)
157	7	197	1098.89	3	3294.64	3294.63	3.08	[LMNGKPmKEK]	>sp|P05030	885	894	[DLSTDPAYGLTSDEVARR]	>sp|P19657	108	125	K892	T111	1	20150421_Debelyy_7438-d10x-5ul-140min.21510.21510.3	6916.61	(L)
157	7	196	1098.89	3	3294.64	3294.63	3.08	[LMNGKPmKEK]	>sp|P05030	885	894	[DLSTDPAYGLTSDEVARR]	>sp|P19657	108	125	K889	T111	1	20150421_Debelyy_7438-d10x-5ul-140min.21510.21510.3	6916.61	(L)
157	8	238	1098.89	3	3294.64	3294.63	3.08	[LmNGKPMKEK]	>sp|P05030	885	894	[DLSTDPAYGLTSDEVARR]	>sp|P19657	108	125	K889	T118	2	20150421_Debelyy_7438-d10x-5ul-140min.21510.21510.3	6916.61	(L)
157	8	238	1098.89	3	3294.64	3294.63	3.08	[LmNGKPMKEK]	>sp|P05030	885	894	[DLSTDPAYGLTSDEVARR]	>sp|P19657	108	125	K889	S119	2	20150421_Debelyy_7438-d10x-5ul-140min.21510.21510.3	6916.61	(L)
157	8	238	1098.89	3	3294.64	3294.63	3.08	[LmNGKPMKEK]	>sp|P05030	885	894	[DLSTDPAYGLTSDEVARR]	>sp|P19657	108	125	K892	T118	2	20150421_Debelyy_7438-d10x-5ul-140min.21510.21510.3	6916.61	(L)
157	8	238	1098.89	3	3294.64	3294.63	3.08	[LmNGKPMKEK]	>sp|P05030	885	894	[DLSTDPAYGLTSDEVARR]	>sp|P19657	108	125	K892	S119	2	20150421_Debelyy_7438-d10x-5ul-140min.21510.21510.3	6916.61	(L)
157	8	212	1098.89	3	3294.64	3294.63	3.08	[LmNGKPMKEK]	>sp|P05030	885	894	[DLSTDPAYGLTSDEVARR]	>sp|P19657	108	125	K889	Y115	2	20150421_Debelyy_7438-d10x-5ul-140min.21510.21510.3	6916.61	(L)
157	8	209	1098.89	3	3294.64	3294.63	3.08	[LmNGKPMKEK]	>sp|P05030	885	894	[DLSTDPAYGLTSDEVARR]	>sp|P19657	108	125	K889	S110	2	20150421_Debelyy_7438-d10x-5ul-140min.21510.21510.3	6916.61	(L)
157	8	209	1098.89	3	3294.64	3294.63	3.08	[LmNGKPMKEK]	>sp|P05030	885	894	[DLSTDPAYGLTSDEVARR]	>sp|P19657	108	125	K889	T111	2	20150421_Debelyy_7438-d10x-5ul-140min.21510.21510.3	6916.61	(L)
157	8	206	1098.89	3	3294.64	3294.63	3.08	[LmNGKPMKEK]	>sp|P05030	885	894	[DLSTDPAYGLTSDEVARR]	>sp|P19657	108	125	K892	Y115	2	20150421_Debelyy_7438-d10x-5ul-140min.21510.21510.3	6916.61	(L)
157	8	202	1098.89	3	3294.64	3294.63	3.08	[LmNGKPMKEK]	>sp|P05030	885	894	[DLSTDPAYGLTSDEVARR]	>sp|P19657	108	125	K892	S110	2	20150421_Debelyy_7438-d10x-5ul-140min.21510.21510.3	6916.61	(L)
157	8	202	1098.89	3	3294.64	3294.63	3.08	[LmNGKPMKEK]	>sp|P05030	885	894	[DLSTDPAYGLTSDEVARR]	>sp|P19657	108	125	K892	T111	2	20150421_Debelyy_7438-d10x-5ul-140min.21510.21510.3	6916.61	(L)
184	2	323	1128.1	2	2255.19	2255.19	1.74	[VSTQHEKET}	>sp|P05030	910	919	[TLANTATVIR]	>sp|P19657	204	213	K916	T204		20150730_Debelyy-G-7664-elu-dil10x-4ul-140min.33923.33923.2	7127.09	(L)
184	2	323	1128.1	2	2255.19	2255.19	1.74	[VSTQHEKET}	>sp|P05030	910	919	[TLANTATVIR]	>sp|P19657	204	213	K916	T208		20150730_Debelyy-G-7664-elu-dil10x-4ul-140min.33923.33923.2	7127.09	(L)
184	2	228	1128.1	2	2255.19	2255.19	1.74	[VSTQHEKET}	>sp|P05030	910	919	[TLANTATVIR]	>sp|P19657	204	213	K916	T210		20150730_Debelyy-G-7664-elu-dil10x-4ul-140min.33923.33923.2	7127.09	(L)
150	15	175	1253.95	3	3759.84	3759.85	-4.47	[VKmLTGDAVGIAK]	>sp|P05030	554	566	[SVEDFmAAmQRVSTQHEKSS}	>sp|P19657	928	948	K555	S928	1	20150421_Debelyy_7438-d10x-5ul-140min.21695.21695.3	6968.34	(H)
Pma1p-Pma2p_BS3
Ions not to be considered for statistics are removed
FDR<0.05	Nr.	Score	m/z	z	M+H+	calc.	Dev.	Peptide(1)	Protein(1)	From(1)	To(1)	Peptide(2)	Protein(2)	From(1)	To(2)	Site(1)	Site(2)	Rank	Scan	RT	Misc.
77	4	186	760.388	5	3797.91	3797.9	1.95	[QYKEKPSK]	>sp|P19657	8	15	[IVTEDJFLQIDQSAITGESLAVDK]	>sp|P05030	216	239	K10	T231	1	20150415_Debelyy_7263_SCX-frct-300-2ul.10247.10247.5	2770.94	(L)
168	7	174	960.161	3	2878.47	2878.47	-0.28	[LmNGKPmK]	>sp|P05030	885	892	[DDTAQTINEARNLGLR]	>sp|P19657	567	582	K889	T569		20160201_Debelyy_8080-SCX7.29739.29739.3	6650.19	(H)
184	3	298	960.162	3	2878.47	2878.47	0.9	[LmNGKPmK]	>sp|P05030	885	892	[DDTAQTINEARNLGLR]	>sp|P19657	567	582	K889	T572		20150730_Debelyy-G-7664-elu-dil10x-4ul-140min.31157.31157.3	6636.55	(H)
157	7	238	1098.89	3	3294.64	3294.63	3.08	[LMNGKPmKEK]	>sp|P05030	885	894	[DLSTDPAYGLTSDEVARR]	>sp|P19657	108	125	K889	T118	1	20150421_Debelyy_7438-d10x-5ul-140min.21510.21510.3	6916.61	(L)
184	2	323	1128.1	2	2255.19	2255.19	1.74	[VSTQHEKET}	>sp|P05030	910	919	[TLANTATVIR]	>sp|P19657	204	213	K916	T204		20150730_Debelyy-G-7664-elu-dil10x-4ul-140min.33923.33923.2	7127.09	(L)
150	15	175	1253.95	3	3759.84	3759.85	-4.47	[VKmLTGDAVGIAK]	>sp|P05030	554	566	[SVEDFmAAmQRVSTQHEKSS}	>sp|P19657	928	948	K555	S928	1	20150421_Debelyy_7438-d10x-5ul-140min.21695.21695.3	6968.34	(H)
								Number of amino acids in peptide 1				Number of amino acids in peptide 2
								7				23
								7				15
								7				15
								9				17
								9				9
								12				20
Pma1p-Pma2p_EDC
FDR<0.05	Nr.	Score	m/z	z	M+H+	calc.	Dev.	Peptide(1)	Protein(1)	From(1)	To(1)	Peptide(2)	Protein(2)	From(1)	To(2)	Site(1)	Site(2)	Rank	Scan	RT
198	7	228	941.473	2	1881.94	1881.94	1.03	[EKPSK]	>sp|P19657	11	15	[KYGLNQmADEK]	>sp|P05030	99	109	K12	E108		20160201_Debelyy_8078-SCX5.9644.9644.2	2591.77
140	1	272	1271.29	3	3811.86	3811.88	-4.97	[KYGLNQmADEK]	>sp|P05030	99	109	[VVPEKDLSTDPAYGLTSDEVARR]	>sp|P19657	103	125	E108	K107		26824	7410
140	1	271	1271.29	3	3811.86	3811.88	-4.97	[KYGLNQmADEK]	>sp|P05030	99	109	[VVPEKDLSTDPAYGLTSDEVARR]	>sp|P19657	103	125	D107	K107		26824	7410
140	1	268	1271.29	3	3811.86	3811.88	-4.97	[KYGLNQmADEK]	>sp|P05030	99	109	[VVPEKDLSTDPAYGLTSDEVARR]	>sp|P19657	103	125	K99	E106		26824	7410
140	1	268	1271.29	3	3811.86	3811.88	-4.97	[KYGLNQmADEK]	>sp|P05030	99	109	[VVPEKDLSTDPAYGLTSDEVARR]	>sp|P19657	103	125	K99	D108		26824	7410
140	1	266	1271.29	3	3811.86	3811.88	-4.97	[KYGLNQmADEK]	>sp|P05030	99	109	[VVPEKDLSTDPAYGLTSDEVARR]	>sp|P19657	103	125	K99	D120		26824	7410
140	1	258	1271.29	3	3811.86	3811.88	-4.97	[KYGLNQmADEK]	>sp|P05030	99	109	[VVPEKDLSTDPAYGLTSDEVARR]	>sp|P19657	103	125	K99	E121		26824	7410
140	1	179	1271.29	3	3811.86	3811.88	-4.97	[KYGLNQmADEK]	>sp|P05030	99	109	[VVPEKDLSTDPAYGLTSDEVARR]	>sp|P19657	103	125	K99	D112		26824	7410
233	5	277	1271.3	3	3811.87	3811.88	-2.66	[KYGLNQmADEK]	>sp|P05030	99	109	[VVPEKDLSTDPAYGLTSDEVARR]	>sp|P19657	103	125	K99	D120		26448	7297
233	5	277	1271.3	3	3811.87	3811.88	-2.66	[KYGLNQmADEK]	>sp|P05030	99	109	[VVPEKDLSTDPAYGLTSDEVARR]	>sp|P19657	103	125	E108	K107		26448	7297
233	5	276	1271.3	3	3811.87	3811.88	-2.66	[KYGLNQmADEK]	>sp|P05030	99	109	[VVPEKDLSTDPAYGLTSDEVARR]	>sp|P19657	103	125	K99	D112		26448	7297
233	5	275	1271.3	3	3811.87	3811.88	-2.66	[KYGLNQmADEK]	>sp|P05030	99	109	[VVPEKDLSTDPAYGLTSDEVARR]	>sp|P19657	103	125	D107	K107		26448	7297
233	5	271	1271.3	3	3811.87	3811.88	-2.66	[KYGLNQmADEK]	>sp|P05030	99	109	[VVPEKDLSTDPAYGLTSDEVARR]	>sp|P19657	103	125	K99	E106		26448	7297
233	5	271	1271.3	3	3811.87	3811.88	-2.66	[KYGLNQmADEK]	>sp|P05030	99	109	[VVPEKDLSTDPAYGLTSDEVARR]	>sp|P19657	103	125	K99	D108		26448	7297
233	5	270	1271.3	3	3811.87	3811.88	-2.66	[KYGLNQmADEK]	>sp|P05030	99	109	[VVPEKDLSTDPAYGLTSDEVARR]	>sp|P19657	103	125	K99	E121		26448	7297
56	1	148	1067.02	2	2133.04	2133.04	-1.99	[LMNGKPMK]	>sp|P05030	885	892	[DDTAQTINEAR]	>sp|P19657	567	577	K889	D567		20160201_Debelyy_8078-FT.25364.25364.2	7328.32
56	1	148	1067.02	2	2133.04	2133.04	-1.99	[LMNGKPMK]	>sp|P05030	885	892	[DDTAQTINEAR]	>sp|P19657	567	577	K889	D568		20160201_Debelyy_8078-FT.25364.25364.2	7328.32
56	1	93	1067.02	2	2133.04	2133.04	-1.99	[LMNGKPMK]	>sp|P05030	885	892	[DDTAQTINEAR]	>sp|P19657	567	577	K889	E575		20160201_Debelyy_8078-FT.25364.25364.2	7328.32
133	4	228	941.473	2	1881.94	1881.94	1.03	[EKPSK]	>sp|P19657	11	15	[KYGLNQmADEK]	>sp|P05030	99	109	K12	E108		20160201_Debelyy_8078-SCX5.9644.9644.2	2591.77
Pma1p-Pma2p_EDC
Ions from a single experiment or merged file that were just interpreted in different ways are counted only once; lines not to be considered for the statistics are in light grey
FDR<0.05	Nr.	Score	m/z	z	M+H+	calc.	Dev.	Peptide(1)	Protein(1)	From(1)	To(1)	Peptide(2)	Protein(2)	From(1)	To(2)	Site(1)	Site(2)	Rank	Scan	RT
198	7	228	941.473	2	1881.94	1881.94	1.03	[EKPSK]	>sp|P19657	11	15	[KYGLNQmADEK]	>sp|P05030	99	109	K12	E108		20160201_Debelyy_8078-SCX5.9644.9644.2	2591.77
133	4	228	941.473	2	1881.94	1881.94	1.03	[EKPSK]	>sp|P19657	11	15	[KYGLNQmADEK]	>sp|P05030	99	109	K12	E108		20160201_Debelyy_8078-SCX5.9644.9644.2	2591.77
56	1	148	1067.02	2	2133.04	2133.04	-1.99	[LMNGKPMK]	>sp|P05030	885	892	[DDTAQTINEAR]	>sp|P19657	567	577	K889	D567		20160201_Debelyy_8078-FT.25364.25364.2	7328.32
56	1	148	1067.02	2	2133.04	2133.04	-1.99	[LMNGKPMK]	>sp|P05030	885	892	[DDTAQTINEAR]	>sp|P19657	567	577	K889	D568		20160201_Debelyy_8078-FT.25364.25364.2	7328.32
56	1	93	1067.02	2	2133.04	2133.04	-1.99	[LMNGKPMK]	>sp|P05030	885	892	[DDTAQTINEAR]	>sp|P19657	567	577	K889	E575		20160201_Debelyy_8078-FT.25364.25364.2	7328.32
140	1	272	1271.29	3	3811.86	3811.88	-4.97	[KYGLNQmADEK]	>sp|P05030	99	109	[VVPEKDLSTDPAYGLTSDEVARR]	>sp|P19657	103	125	E108	K107		26824	7410
140	1	271	1271.29	3	3811.86	3811.88	-4.97	[KYGLNQmADEK]	>sp|P05030	99	109	[VVPEKDLSTDPAYGLTSDEVARR]	>sp|P19657	103	125	D107	K107		26824	7410
140	1	268	1271.29	3	3811.86	3811.88	-4.97	[KYGLNQmADEK]	>sp|P05030	99	109	[VVPEKDLSTDPAYGLTSDEVARR]	>sp|P19657	103	125	K99	E106		26824	7410
140	1	268	1271.29	3	3811.86	3811.88	-4.97	[KYGLNQmADEK]	>sp|P05030	99	109	[VVPEKDLSTDPAYGLTSDEVARR]	>sp|P19657	103	125	K99	D108		26824	7410
140	1	266	1271.29	3	3811.86	3811.88	-4.97	[KYGLNQmADEK]	>sp|P05030	99	109	[VVPEKDLSTDPAYGLTSDEVARR]	>sp|P19657	103	125	K99	D120		26824	7410
140	1	258	1271.29	3	3811.86	3811.88	-4.97	[KYGLNQmADEK]	>sp|P05030	99	109	[VVPEKDLSTDPAYGLTSDEVARR]	>sp|P19657	103	125	K99	E121		26824	7410
140	1	179	1271.29	3	3811.86	3811.88	-4.97	[KYGLNQmADEK]	>sp|P05030	99	109	[VVPEKDLSTDPAYGLTSDEVARR]	>sp|P19657	103	125	K99	D112		26824	7410
233	5	277	1271.3	3	3811.87	3811.88	-2.66	[KYGLNQmADEK]	>sp|P05030	99	109	[VVPEKDLSTDPAYGLTSDEVARR]	>sp|P19657	103	125	K99	D120		26448	7297
233	5	277	1271.3	3	3811.87	3811.88	-2.66	[KYGLNQmADEK]	>sp|P05030	99	109	[VVPEKDLSTDPAYGLTSDEVARR]	>sp|P19657	103	125	E108	K107		26448	7297
233	5	276	1271.3	3	3811.87	3811.88	-2.66	[KYGLNQmADEK]	>sp|P05030	99	109	[VVPEKDLSTDPAYGLTSDEVARR]	>sp|P19657	103	125	K99	D112		26448	7297
233	5	275	1271.3	3	3811.87	3811.88	-2.66	[KYGLNQmADEK]	>sp|P05030	99	109	[VVPEKDLSTDPAYGLTSDEVARR]	>sp|P19657	103	125	D107	K107		26448	7297
233	5	271	1271.3	3	3811.87	3811.88	-2.66	[KYGLNQmADEK]	>sp|P05030	99	109	[VVPEKDLSTDPAYGLTSDEVARR]	>sp|P19657	103	125	K99	E106		26448	7297
233	5	271	1271.3	3	3811.87	3811.88	-2.66	[KYGLNQmADEK]	>sp|P05030	99	109	[VVPEKDLSTDPAYGLTSDEVARR]	>sp|P19657	103	125	K99	D108		26448	7297
233	5	270	1271.3	3	3811.87	3811.88	-2.66	[KYGLNQmADEK]	>sp|P05030	99	109	[VVPEKDLSTDPAYGLTSDEVARR]	>sp|P19657	103	125	K99	E121		26448	7297
Pma1p-Pma2p_EDC
Ions not to be considered for statistics are removed
FDR<0.05	Nr.	Score	m/z	z	M+H+	calc.	Dev.	Peptide(1)	Protein(1)	From(1)	To(1)	Peptide(2)	Protein(2)	From(1)	To(2)	Site(1)	Site(2)	Rank	Scan	RT
198	7	228	941.473	2	1881.94	1881.94	1.03	[EKPSK]	>sp|P19657	11	15	[KYGLNQmADEK]	>sp|P05030	99	109	K12	E108		20160201_Debelyy_8078-SCX5.9644.9644.2	2591.77
56	1	148	1067.02	2	2133.04	2133.04	-1.99	[LMNGKPMK]	>sp|P05030	885	892	[DDTAQTINEAR]	>sp|P19657	567	577	K889	D567		20160201_Debelyy_8078-FT.25364.25364.2	7328.32
140	1	272	1271.29	3	3811.86	3811.88	-4.97	[KYGLNQmADEK]	>sp|P05030	99	109	[VVPEKDLSTDPAYGLTSDEVARR]	>sp|P19657	103	125	E108	K107		26824	7410
233	5	277	1271.3	3	3811.87	3811.88	-2.66	[KYGLNQmADEK]	>sp|P05030	99	109	[VVPEKDLSTDPAYGLTSDEVARR]	>sp|P19657	103	125	K99	D120		26448	7297
								Number of amino acids in peptide 1				Number of amino acids in peptide 2
								5				11
								8				11
								11				23
								11				23

## Sheet: Sec61p-Sss1p
Sec61p-Sss1p_BS3
FDR<0.05	Nr.	Score	m/z	z	M+H+	calc.	Dev.	Peptide(1)	Protein(1)	From(1)	To(1)	Peptide(2)	Protein(2)	From(1)	To(2)	Site(1)	Site(2)	Rank	Scan	RT	Misc.
112	1	159	423.759	4	1692.01	1692.01	4.45	[KDKKR]	>sp|P32915	226	230	[EYTKIVK]	>sp|P35179	46	52	K229	T48		20150828_Debelyy_7720-d20x-1ul-140min.25362.25362.4	7401.14	(L)
112	1	159	423.759	4	1692.01	1692.01	4.45	[KDKKR]	>sp|P32915	226	230	[EYTKIVK]	>sp|P35179	46	52	K229	K49		20150828_Debelyy_7720-d20x-1ul-140min.25362.25362.4	7401.14	(L)
64	1	74	741.39	3	2222.15	2222.15	2.46	[DIAKQFK]	>sp|P32915	390	396	{MARASEKGEEK]	>sp|P35179	0	11	K393	S5		20150415_Debelyy_7263_SCX-frct-200-2ul.11625.11625.3	2872.47	(L)
64	1	64	741.39	3	2222.15	2222.15	2.46	[DIAKQFK]	>sp|P32915	390	396	{MARASEKGEEK]	>sp|P35179	0	11	K393	{0		20150415_Debelyy_7263_SCX-frct-200-2ul.11625.11625.3	2872.47	(L)
148	2	561	1094.58	2	2188.15	2188.14	3.7	{MAR]	>sp|P35179	0	3	[TWIEISGTSPRDIAK]	>sp|P32915	379	393	{0	T386	2	20150730_Debelyy-G-7664-elu-dil10x-4ul-140min.28293.28293.2	6120.58	(L)
148	2	558	1094.58	2	2188.15	2188.14	3.7	{MAR]	>sp|P35179	0	3	[TWIEISGTSPRDIAK]	>sp|P32915	379	393	{0	S384	2	20150730_Debelyy-G-7664-elu-dil10x-4ul-140min.28293.28293.2	6120.58	(L)
148	2	557	1094.58	2	2188.15	2188.14	3.7	{MAR]	>sp|P35179	0	3	[TWIEISGTSPRDIAK]	>sp|P32915	379	393	{0	S387	2	20150730_Debelyy-G-7664-elu-dil10x-4ul-140min.28293.28293.2	6120.58	(L)
148	2	469	1094.58	2	2188.15	2188.14	3.7	{MAR]	>sp|P35179	0	3	[TWIEISGTSPRDIAK]	>sp|P32915	379	393	{0	T379	2	20150730_Debelyy-G-7664-elu-dil10x-4ul-140min.28293.28293.2	6120.58	(L)
148	3	224	623.357	2	1245.71	1245.7	1.66	[KDKK]	>sp|P32915	226	229	[GEEKK]	>sp|P35179	8	12	K228	K11		20150730_Debelyy-G-7664-elu-dil10x-4ul-140min.32543.32543.2	6882.06	(L)
148	4	172	830.749	3	2490.23	2490.24	-4.36	[DQGMVINGKR]	>sp|P32915	397	406	{MARASEKGEEK]	>sp|P35179	0	11	K405	K7		20150730_Debelyy-G-7664-elu-dil10x-4ul-140min.32118.32118.3	6806.83	(L)
148	4	171	830.749	3	2490.23	2490.24	-4.36	[DQGMVINGKR]	>sp|P32915	397	406	{MARASEKGEEK]	>sp|P35179	0	11	K405	S5		20150730_Debelyy-G-7664-elu-dil10x-4ul-140min.32118.32118.3	6806.83	(L)
204	2	241	663.374	3	1988.11	1988.1	3.56	[KPDLK]	>sp|P35179	41	45	[TWIEISGTSPR]	>sp|P32915	379	389	K41	T386		20150730_Debelyy-M-7663-elu-dil10x-4ul-140min.22122.22122.3	5011.4	(H)
204	2	240	663.374	3	1988.11	1988.1	3.56	[KPDLK]	>sp|P35179	41	45	[TWIEISGTSPR]	>sp|P32915	379	389	K41	S387		20150730_Debelyy-M-7663-elu-dil10x-4ul-140min.22122.22122.3	5011.4	(H)
204	2	227	663.374	3	1988.11	1988.1	3.56	[KPDLK]	>sp|P35179	41	45	[TWIEISGTSPR]	>sp|P32915	379	389	K41	S384		20150730_Debelyy-M-7663-elu-dil10x-4ul-140min.22122.22122.3	5011.4	(H)
204	2	218	663.374	3	1988.11	1988.1	3.56	[KPDLK]	>sp|P35179	41	45	[TWIEISGTSPR]	>sp|P32915	379	389	K41	T379		20150730_Debelyy-M-7663-elu-dil10x-4ul-140min.22122.22122.3	5011.4	(H)
133	1	146	905.24	4	3617.94	3617.95	-4.3	[ETSIYRELKK]	>sp|P32915	407	416	[KQSNNQVEKLVEAPVEFVR]	>sp|P35179	12	30	T408	K12		20150922_Debelyy_7777-dil20x-2ul-140min.23588.23588.4	7006.22	(L)
133	1	146	905.24	4	3617.94	3617.95	-4.3	[ETSIYRELKK]	>sp|P32915	407	416	[KQSNNQVEKLVEAPVEFVR]	>sp|P35179	12	30	T408	K20		20150922_Debelyy_7777-dil20x-2ul-140min.23588.23588.4	7006.22	(L)
133	1	146	905.24	4	3617.94	3617.95	-4.3	[ETSIYRELKK]	>sp|P32915	407	416	[KQSNNQVEKLVEAPVEFVR]	>sp|P35179	12	30	S409	K12		20150922_Debelyy_7777-dil20x-2ul-140min.23588.23588.4	7006.22	(L)
133	1	146	905.24	4	3617.94	3617.95	-4.3	[ETSIYRELKK]	>sp|P32915	407	416	[KQSNNQVEKLVEAPVEFVR]	>sp|P35179	12	30	S409	K20		20150922_Debelyy_7777-dil20x-2ul-140min.23588.23588.4	7006.22	(L)
133	1	146	905.24	4	3617.94	3617.95	-4.3	[ETSIYRELKK]	>sp|P32915	407	416	[KQSNNQVEKLVEAPVEFVR]	>sp|P35179	12	30	Y411	K12		20150922_Debelyy_7777-dil20x-2ul-140min.23588.23588.4	7006.22	(L)
133	1	146	905.24	4	3617.94	3617.95	-4.3	[ETSIYRELKK]	>sp|P32915	407	416	[KQSNNQVEKLVEAPVEFVR]	>sp|P35179	12	30	Y411	K20		20150922_Debelyy_7777-dil20x-2ul-140min.23588.23588.4	7006.22	(L)
132	1	170	484.612	3	1451.82	1451.82	1.73	[KDKK]	>sp|P32915	226	229	{MARASEK]	>sp|P35179	0	7	K226	S5		20150922_Debelyy_7778-dil10x-2ul-140min.11859.11859.3	3769.34	(H)
132	1	170	484.612	3	1451.82	1451.82	1.73	[KDKK]	>sp|P32915	226	229	{MARASEK]	>sp|P35179	0	7	K228	S5		20150922_Debelyy_7778-dil10x-2ul-140min.11859.11859.3	3769.34	(H)
62	1	83	987.511	2	1974.02	1974.02	-1.64	[GEEKK]	>sp|P35179	8	12	[TWIEISGTSPR]	>sp|P32915	379	389	K11	T386		20160201_Debelyy_8080-FT.16846.16846.2	5082.9	(L)
62	1	83	987.511	2	1974.02	1974.02	-1.64	[GEEKK]	>sp|P35179	8	12	[TWIEISGTSPR]	>sp|P32915	379	389	K11	S387		20160201_Debelyy_8080-FT.16846.16846.2	5082.9	(L)
74	1	92	987.511	2	1974.02	1974.02	-1.33	[GEEKK]	>sp|P35179	8	12	[TWIEISGTSPR]	>sp|P32915	379	389	K11	T386		20160201_Debelyy_8080-SCX2.19527.19527.2	5112.19	(L)
74	1	92	987.511	2	1974.02	1974.02	-1.33	[GEEKK]	>sp|P35179	8	12	[TWIEISGTSPR]	>sp|P32915	379	389	K11	S387		20160201_Debelyy_8080-SCX2.19527.19527.2	5112.19	(L)
103	2	137	484.612	3	1451.82	1451.82	2.69	[KDKK]	>sp|P32915	226	229	{MARASEK]	>sp|P35179	0	7	K228	S5		20160201_Debelyy_8080-SCX6.10986.10986.3	2904.3	(H)
103	2	134	484.612	3	1451.82	1451.82	2.69	[KDKK]	>sp|P32915	226	229	{MARASEK]	>sp|P35179	0	7	K226	S5		20160201_Debelyy_8080-SCX6.10986.10986.3	2904.3	(H)
170	2	223	817.921	2	1634.84	1634.83	2.17	{MAR]	>sp|P35179	0	3	[AFAPTTVNSGR]	>sp|P32915	197	207	{0	S205		20150415_Debelyy_7263_SCX-frct-FT-2ul.10411.10411.2	2125.66	(L)
82	3	84	1022.86	3	3066.57	3066.57	-1.94	{mARASEKGEEK]	>sp|P35179	0	11	[TWIEISGTSPRDIAK]	>sp|P32915	379	393	{0	S384		20150206_Debelyy_7263-d10x-2ul-140min.43303.43303.3	0]=6731.4534	(H)
82	3	84	1022.86	3	3066.57	3066.57	-1.94	{mARASEKGEEK]	>sp|P35179	0	11	[TWIEISGTSPRDIAK]	>sp|P32915	379	393	{0	T386		20150206_Debelyy_7263-d10x-2ul-140min.43303.43303.3	0]=6731.4534	(H)
82	3	84	1022.86	3	3066.57	3066.57	-1.94	{mARASEKGEEK]	>sp|P35179	0	11	[TWIEISGTSPRDIAK]	>sp|P32915	379	393	{0	S387		20150206_Debelyy_7263-d10x-2ul-140min.43303.43303.3	0]=6731.4534	(H)
93	1	150	712.39	3	2135.16	2135.15	1.19	[EYTKIVK]	>sp|P35179	46	52	[DQGMVINGKR]	>sp|P32915	397	406	Y47	K405		20150209_Debelyy_7264-d10x-4ul-140min.38117.38117.3	0]=6113.5422	(L)
93	1	150	712.39	3	2135.16	2135.15	1.19	[EYTKIVK]	>sp|P35179	46	52	[DQGMVINGKR]	>sp|P32915	397	406	T48	K405		20150209_Debelyy_7264-d10x-4ul-140min.38117.38117.3	0]=6113.5422	(L)
93	1	150	712.39	3	2135.16	2135.15	1.19	[EYTKIVK]	>sp|P35179	46	52	[DQGMVINGKR]	>sp|P32915	397	406	K49	K405		20150209_Debelyy_7264-d10x-4ul-140min.38117.38117.3	0]=6113.5422	(L)
93	2	140	501.94	3	1503.81	1503.8	4.41	{mAR]	>sp|P35179	0	3	[YPTNPLIR]	>sp|P32915	314	321	{0	Y314		20150209_Debelyy_7264-d10x-4ul-140min.23437.23437.3	0]=4298.22384	(L)
93	2	140	501.94	3	1503.81	1503.8	4.41	{mAR]	>sp|P35179	0	3	[YPTNPLIR]	>sp|P32915	314	321	{0	T316		20150209_Debelyy_7264-d10x-4ul-140min.23437.23437.3	0]=4298.22384	(L)
126	2	156	754.38	3	2261.12	2261.13	-1.83	[ASEKGEEK]	>sp|P35179	4	11	[TWIEISGTSPR]	>sp|P32915	379	389	K7	T386		20141205_Debelyy_7182-d10x-140min.30752.30752.3	0]=6072.7326	(L)
126	2	156	754.38	3	2261.12	2261.13	-1.83	[ASEKGEEK]	>sp|P35179	4	11	[TWIEISGTSPR]	>sp|P32915	379	389	K7	S387		20141205_Debelyy_7182-d10x-140min.30752.30752.3	0]=6072.7326	(L)
126	2	128	754.38	3	2261.12	2261.13	-1.83	[ASEKGEEK]	>sp|P35179	4	11	[TWIEISGTSPR]	>sp|P32915	379	389	K7	S384		20141205_Debelyy_7182-d10x-140min.30752.30752.3	0]=6072.7326	(L)
112	1	150	712.39	3	2135.16	2135.15	1.19	[EYTKIVK]	>sp|P35179	46	52	[DQGMVINGKR]	>sp|P32915	397	406	Y47	K405		20150209_Debelyy_7264-d10x-4ul-140min.38117.38117.3	0]=6113.5422	(L)
112	1	150	712.39	3	2135.16	2135.15	1.19	[EYTKIVK]	>sp|P35179	46	52	[DQGMVINGKR]	>sp|P32915	397	406	T48	K405		20150209_Debelyy_7264-d10x-4ul-140min.38117.38117.3	0]=6113.5422	(L)
112	1	150	712.39	3	2135.16	2135.15	1.19	[EYTKIVK]	>sp|P35179	46	52	[DQGMVINGKR]	>sp|P32915	397	406	K49	K405		20150209_Debelyy_7264-d10x-4ul-140min.38117.38117.3	0]=6113.5422	(L)
112	2	140	501.94	3	1503.81	1503.8	4.41	{mAR]	>sp|P35179	0	3	[YPTNPLIR]	>sp|P32915	314	321	{0	Y314		20150209_Debelyy_7264-d10x-4ul-140min.23437.23437.3	0]=4298.22384	(L)
112	2	140	501.94	3	1503.81	1503.8	4.41	{mAR]	>sp|P35179	0	3	[YPTNPLIR]	>sp|P32915	314	321	{0	T316		20150209_Debelyy_7264-d10x-4ul-140min.23437.23437.3	0]=4298.22384	(L)
160	1	170	484.612	3	1451.82	1451.82	1.73	[KDKK]	>sp|P32915	226	229	{MARASEK]	>sp|P35179	0	7	K226	S5		20150922_Debelyy_7778-dil10x-2ul-140min.11859.11859.3	3769.34	(H)
160	1	170	484.612	3	1451.82	1451.82	1.73	[KDKK]	>sp|P32915	226	229	{MARASEK]	>sp|P35179	0	7	K228	S5		20150922_Debelyy_7778-dil10x-2ul-140min.11859.11859.3	3769.34	(H)
Sec61p-Sss1p_BS3
Ions from a single experiment or merged file that were just interpreted in different ways are counted only once; lines not to be considered for the statistics are in light grey
FDR<0.05	Nr.	Score	m/z	z	M+H+	calc.	Dev.	Peptide(1)	Protein(1)	From(1)	To(1)	Peptide(2)	Protein(2)	From(1)	To(2)	Site(1)	Site(2)	Rank	Scan	RT	Misc.
112	1	159	423.759	4	1692.01	1692.01	4.45	[KDKKR]	>sp|P32915	226	230	[EYTKIVK]	>sp|P35179	46	52	K229	T48		20150828_Debelyy_7720-d20x-1ul-140min.25362.25362.4	7401.14	(L)
112	1	159	423.759	4	1692.01	1692.01	4.45	[KDKKR]	>sp|P32915	226	230	[EYTKIVK]	>sp|P35179	46	52	K229	K49		20150828_Debelyy_7720-d20x-1ul-140min.25362.25362.4	7401.14	(L)
103	2	137	484.612	3	1451.82	1451.82	2.69	[KDKK]	>sp|P32915	226	229	{MARASEK]	>sp|P35179	0	7	K228	S5		20160201_Debelyy_8080-SCX6.10986.10986.3	2904.3	(H)
103	2	134	484.612	3	1451.82	1451.82	2.69	[KDKK]	>sp|P32915	226	229	{MARASEK]	>sp|P35179	0	7	K226	S5		20160201_Debelyy_8080-SCX6.10986.10986.3	2904.3	(H)
132	1	170	484.612	3	1451.82	1451.82	1.73	[KDKK]	>sp|P32915	226	229	{MARASEK]	>sp|P35179	0	7	K226	S5		20150922_Debelyy_7778-dil10x-2ul-140min.11859.11859.3	3769.34	(H)
132	1	170	484.612	3	1451.82	1451.82	1.73	[KDKK]	>sp|P32915	226	229	{MARASEK]	>sp|P35179	0	7	K228	S5		20150922_Debelyy_7778-dil10x-2ul-140min.11859.11859.3	3769.34	(H)
160	1	170	484.612	3	1451.82	1451.82	1.73	[KDKK]	>sp|P32915	226	229	{MARASEK]	>sp|P35179	0	7	K226	S5		20150922_Debelyy_7778-dil10x-2ul-140min.11859.11859.3	3769.34	(H)
160	1	170	484.612	3	1451.82	1451.82	1.73	[KDKK]	>sp|P32915	226	229	{MARASEK]	>sp|P35179	0	7	K228	S5		20150922_Debelyy_7778-dil10x-2ul-140min.11859.11859.3	3769.34	(H)
93	2	140	501.94	3	1503.81	1503.8	4.41	{mAR]	>sp|P35179	0	3	[YPTNPLIR]	>sp|P32915	314	321	{0	Y314		20150209_Debelyy_7264-d10x-4ul-140min.23437.23437.3	0]=4298.22384	(L)
93	2	140	501.94	3	1503.81	1503.8	4.41	{mAR]	>sp|P35179	0	3	[YPTNPLIR]	>sp|P32915	314	321	{0	T316		20150209_Debelyy_7264-d10x-4ul-140min.23437.23437.3	0]=4298.22384	(L)
112	2	140	501.94	3	1503.81	1503.8	4.41	{mAR]	>sp|P35179	0	3	[YPTNPLIR]	>sp|P32915	314	321	{0	Y314		20150209_Debelyy_7264-d10x-4ul-140min.23437.23437.3	0]=4298.22384	(L)
112	2	140	501.94	3	1503.81	1503.8	4.41	{mAR]	>sp|P35179	0	3	[YPTNPLIR]	>sp|P32915	314	321	{0	T316		20150209_Debelyy_7264-d10x-4ul-140min.23437.23437.3	0]=4298.22384	(L)
148	3	224	623.357	2	1245.71	1245.7	1.66	[KDKK]	>sp|P32915	226	229	[GEEKK]	>sp|P35179	8	12	K228	K11		20150730_Debelyy-G-7664-elu-dil10x-4ul-140min.32543.32543.2	6882.06	(L)
204	2	241	663.374	3	1988.11	1988.1	3.56	[KPDLK]	>sp|P35179	41	45	[TWIEISGTSPR]	>sp|P32915	379	389	K41	T386		20150730_Debelyy-M-7663-elu-dil10x-4ul-140min.22122.22122.3	5011.4	(H)
204	2	240	663.374	3	1988.11	1988.1	3.56	[KPDLK]	>sp|P35179	41	45	[TWIEISGTSPR]	>sp|P32915	379	389	K41	S387		20150730_Debelyy-M-7663-elu-dil10x-4ul-140min.22122.22122.3	5011.4	(H)
204	2	227	663.374	3	1988.11	1988.1	3.56	[KPDLK]	>sp|P35179	41	45	[TWIEISGTSPR]	>sp|P32915	379	389	K41	S384		20150730_Debelyy-M-7663-elu-dil10x-4ul-140min.22122.22122.3	5011.4	(H)
204	2	218	663.374	3	1988.11	1988.1	3.56	[KPDLK]	>sp|P35179	41	45	[TWIEISGTSPR]	>sp|P32915	379	389	K41	T379		20150730_Debelyy-M-7663-elu-dil10x-4ul-140min.22122.22122.3	5011.4	(H)
93	1	150	712.39	3	2135.16	2135.15	1.19	[EYTKIVK]	>sp|P35179	46	52	[DQGMVINGKR]	>sp|P32915	397	406	Y47	K405		20150209_Debelyy_7264-d10x-4ul-140min.38117.38117.3	0]=6113.5422	(L)
93	1	150	712.39	3	2135.16	2135.15	1.19	[EYTKIVK]	>sp|P35179	46	52	[DQGMVINGKR]	>sp|P32915	397	406	T48	K405		20150209_Debelyy_7264-d10x-4ul-140min.38117.38117.3	0]=6113.5422	(L)
93	1	150	712.39	3	2135.16	2135.15	1.19	[EYTKIVK]	>sp|P35179	46	52	[DQGMVINGKR]	>sp|P32915	397	406	K49	K405		20150209_Debelyy_7264-d10x-4ul-140min.38117.38117.3	0]=6113.5422	(L)
112	1	150	712.39	3	2135.16	2135.15	1.19	[EYTKIVK]	>sp|P35179	46	52	[DQGMVINGKR]	>sp|P32915	397	406	Y47	K405		20150209_Debelyy_7264-d10x-4ul-140min.38117.38117.3	0]=6113.5422	(L)
112	1	150	712.39	3	2135.16	2135.15	1.19	[EYTKIVK]	>sp|P35179	46	52	[DQGMVINGKR]	>sp|P32915	397	406	T48	K405		20150209_Debelyy_7264-d10x-4ul-140min.38117.38117.3	0]=6113.5422	(L)
112	1	150	712.39	3	2135.16	2135.15	1.19	[EYTKIVK]	>sp|P35179	46	52	[DQGMVINGKR]	>sp|P32915	397	406	K49	K405		20150209_Debelyy_7264-d10x-4ul-140min.38117.38117.3	0]=6113.5422	(L)
64	1	74	741.39	3	2222.15	2222.15	2.46	[DIAKQFK]	>sp|P32915	390	396	{MARASEKGEEK]	>sp|P35179	0	11	K393	S5		20150415_Debelyy_7263_SCX-frct-200-2ul.11625.11625.3	2872.47	(L)
64	1	64	741.39	3	2222.15	2222.15	2.46	[DIAKQFK]	>sp|P32915	390	396	{MARASEKGEEK]	>sp|P35179	0	11	K393	{0		20150415_Debelyy_7263_SCX-frct-200-2ul.11625.11625.3	2872.47	(L)
126	2	156	754.38	3	2261.12	2261.13	-1.83	[ASEKGEEK]	>sp|P35179	4	11	[TWIEISGTSPR]	>sp|P32915	379	389	K7	T386		20141205_Debelyy_7182-d10x-140min.30752.30752.3	0]=6072.7326	(L)
126	2	156	754.38	3	2261.12	2261.13	-1.83	[ASEKGEEK]	>sp|P35179	4	11	[TWIEISGTSPR]	>sp|P32915	379	389	K7	S387		20141205_Debelyy_7182-d10x-140min.30752.30752.3	0]=6072.7326	(L)
126	2	128	754.38	3	2261.12	2261.13	-1.83	[ASEKGEEK]	>sp|P35179	4	11	[TWIEISGTSPR]	>sp|P32915	379	389	K7	S384		20141205_Debelyy_7182-d10x-140min.30752.30752.3	0]=6072.7326	(L)
170	2	223	817.921	2	1634.84	1634.83	2.17	{MAR]	>sp|P35179	0	3	[AFAPTTVNSGR]	>sp|P32915	197	207	{0	S205		20150415_Debelyy_7263_SCX-frct-FT-2ul.10411.10411.2	2125.66	(L)
148	4	172	830.749	3	2490.23	2490.24	-4.36	[DQGMVINGKR]	>sp|P32915	397	406	{MARASEKGEEK]	>sp|P35179	0	11	K405	K7		20150730_Debelyy-G-7664-elu-dil10x-4ul-140min.32118.32118.3	6806.83	(L)
148	4	171	830.749	3	2490.23	2490.24	-4.36	[DQGMVINGKR]	>sp|P32915	397	406	{MARASEKGEEK]	>sp|P35179	0	11	K405	S5		20150730_Debelyy-G-7664-elu-dil10x-4ul-140min.32118.32118.3	6806.83	(L)
133	1	146	905.24	4	3617.94	3617.95	-4.3	[ETSIYRELKK]	>sp|P32915	407	416	[KQSNNQVEKLVEAPVEFVR]	>sp|P35179	12	30	T408	K12		20150922_Debelyy_7777-dil20x-2ul-140min.23588.23588.4	7006.22	(L)
133	1	146	905.24	4	3617.94	3617.95	-4.3	[ETSIYRELKK]	>sp|P32915	407	416	[KQSNNQVEKLVEAPVEFVR]	>sp|P35179	12	30	T408	K20		20150922_Debelyy_7777-dil20x-2ul-140min.23588.23588.4	7006.22	(L)
133	1	146	905.24	4	3617.94	3617.95	-4.3	[ETSIYRELKK]	>sp|P32915	407	416	[KQSNNQVEKLVEAPVEFVR]	>sp|P35179	12	30	S409	K12		20150922_Debelyy_7777-dil20x-2ul-140min.23588.23588.4	7006.22	(L)
133	1	146	905.24	4	3617.94	3617.95	-4.3	[ETSIYRELKK]	>sp|P32915	407	416	[KQSNNQVEKLVEAPVEFVR]	>sp|P35179	12	30	S409	K20		20150922_Debelyy_7777-dil20x-2ul-140min.23588.23588.4	7006.22	(L)
133	1	146	905.24	4	3617.94	3617.95	-4.3	[ETSIYRELKK]	>sp|P32915	407	416	[KQSNNQVEKLVEAPVEFVR]	>sp|P35179	12	30	Y411	K12		20150922_Debelyy_7777-dil20x-2ul-140min.23588.23588.4	7006.22	(L)
133	1	146	905.24	4	3617.94	3617.95	-4.3	[ETSIYRELKK]	>sp|P32915	407	416	[KQSNNQVEKLVEAPVEFVR]	>sp|P35179	12	30	Y411	K20		20150922_Debelyy_7777-dil20x-2ul-140min.23588.23588.4	7006.22	(L)
62	1	83	987.511	2	1974.02	1974.02	-1.64	[GEEKK]	>sp|P35179	8	12	[TWIEISGTSPR]	>sp|P32915	379	389	K11	T386		20160201_Debelyy_8080-FT.16846.16846.2	5082.9	(L)
62	1	83	987.511	2	1974.02	1974.02	-1.64	[GEEKK]	>sp|P35179	8	12	[TWIEISGTSPR]	>sp|P32915	379	389	K11	S387		20160201_Debelyy_8080-FT.16846.16846.2	5082.9	(L)
74	1	92	987.511	2	1974.02	1974.02	-1.33	[GEEKK]	>sp|P35179	8	12	[TWIEISGTSPR]	>sp|P32915	379	389	K11	T386		20160201_Debelyy_8080-SCX2.19527.19527.2	5112.19	(L)
74	1	92	987.511	2	1974.02	1974.02	-1.33	[GEEKK]	>sp|P35179	8	12	[TWIEISGTSPR]	>sp|P32915	379	389	K11	S387		20160201_Debelyy_8080-SCX2.19527.19527.2	5112.19	(L)
82	3	84	1022.86	3	3066.57	3066.57	-1.94	{mARASEKGEEK]	>sp|P35179	0	11	[TWIEISGTSPRDIAK]	>sp|P32915	379	393	{0	S384		20150206_Debelyy_7263-d10x-2ul-140min.43303.43303.3	0]=6731.4534	(H)
82	3	84	1022.86	3	3066.57	3066.57	-1.94	{mARASEKGEEK]	>sp|P35179	0	11	[TWIEISGTSPRDIAK]	>sp|P32915	379	393	{0	T386		20150206_Debelyy_7263-d10x-2ul-140min.43303.43303.3	0]=6731.4534	(H)
82	3	84	1022.86	3	3066.57	3066.57	-1.94	{mARASEKGEEK]	>sp|P35179	0	11	[TWIEISGTSPRDIAK]	>sp|P32915	379	393	{0	S387		20150206_Debelyy_7263-d10x-2ul-140min.43303.43303.3	0]=6731.4534	(H)
148	2	561	1094.58	2	2188.15	2188.14	3.7	{MAR]	>sp|P35179	0	3	[TWIEISGTSPRDIAK]	>sp|P32915	379	393	{0	T386	2	20150730_Debelyy-G-7664-elu-dil10x-4ul-140min.28293.28293.2	6120.58	(L)
148	2	558	1094.58	2	2188.15	2188.14	3.7	{MAR]	>sp|P35179	0	3	[TWIEISGTSPRDIAK]	>sp|P32915	379	393	{0	S384	2	20150730_Debelyy-G-7664-elu-dil10x-4ul-140min.28293.28293.2	6120.58	(L)
148	2	557	1094.58	2	2188.15	2188.14	3.7	{MAR]	>sp|P35179	0	3	[TWIEISGTSPRDIAK]	>sp|P32915	379	393	{0	S387	2	20150730_Debelyy-G-7664-elu-dil10x-4ul-140min.28293.28293.2	6120.58	(L)
148	2	469	1094.58	2	2188.15	2188.14	3.7	{MAR]	>sp|P35179	0	3	[TWIEISGTSPRDIAK]	>sp|P32915	379	393	{0	T379	2	20150730_Debelyy-G-7664-elu-dil10x-4ul-140min.28293.28293.2	6120.58	(L)
Sec61p-Sss1p_BS3
Ions not to be considered for statistics are removed
FDR<0.05	Nr.	Score	m/z	z	M+H+	calc.	Dev.	Peptide(1)	Protein(1)	From(1)	To(1)	Peptide(2)	Protein(2)	From(1)	To(2)	Site(1)	Site(2)	Rank	Scan	RT	Misc.
112	1	159	423.759	4	1692.01	1692.01	4.45	[KDKKR]	>sp|P32915	226	230	[EYTKIVK]	>sp|P35179	46	52	K229	T48		20150828_Debelyy_7720-d20x-1ul-140min.25362.25362.4	7401.14	(L)
103	2	137	484.612	3	1451.82	1451.82	2.69	[KDKK]	>sp|P32915	226	229	{MARASEK]	>sp|P35179	1	7	K228	S5		20160201_Debelyy_8080-SCX6.10986.10986.3	2904.3	(H)
132	1	170	484.612	3	1451.82	1451.82	1.73	[KDKK]	>sp|P32915	226	229	{MARASEK]	>sp|P35179	1	7	K226	S5		20150922_Debelyy_7778-dil10x-2ul-140min.11859.11859.3	3769.34	(H)
160	1	170	484.612	3	1451.82	1451.82	1.73	[KDKK]	>sp|P32915	226	229	{MARASEK]	>sp|P35179	1	7	K226	S5		20150922_Debelyy_7778-dil10x-2ul-140min.11859.11859.3	3769.34	(H)
93	2	140	501.94	3	1503.81	1503.8	4.41	{mAR]	>sp|P35179	1	3	[YPTNPLIR]	>sp|P32915	314	321	{0	Y314		20150209_Debelyy_7264-d10x-4ul-140min.23437.23437.3	0]=4298.22384	(L)
148	3	224	623.357	2	1245.71	1245.7	1.66	[KDKK]	>sp|P32915	226	229	[GEEKK]	>sp|P35179	8	12	K228	K11		20150730_Debelyy-G-7664-elu-dil10x-4ul-140min.32543.32543.2	6882.06	(L)
204	2	241	663.374	3	1988.11	1988.1	3.56	[KPDLK]	>sp|P35179	41	45	[TWIEISGTSPR]	>sp|P32915	379	389	K41	T386		20150730_Debelyy-M-7663-elu-dil10x-4ul-140min.22122.22122.3	5011.4	(H)
93	1	150	712.39	3	2135.16	2135.15	1.19	[EYTKIVK]	>sp|P35179	46	52	[DQGMVINGKR]	>sp|P32915	397	406	Y47	K405		20150209_Debelyy_7264-d10x-4ul-140min.38117.38117.3	0]=6113.5422	(L)
64	1	74	741.39	3	2222.15	2222.15	2.46	[DIAKQFK]	>sp|P32915	390	396	{MARASEKGEEK]	>sp|P35179	1	11	K393	S5		20150415_Debelyy_7263_SCX-frct-200-2ul.11625.11625.3	2872.47	(L)
126	2	156	754.38	3	2261.12	2261.13	-1.83	[ASEKGEEK]	>sp|P35179	4	11	[TWIEISGTSPR]	>sp|P32915	379	389	K7	T386		20141205_Debelyy_7182-d10x-140min.30752.30752.3	0]=6072.7326	(L)
170	2	223	817.921	2	1634.84	1634.83	2.17	{MAR]	>sp|P35179	1	3	[AFAPTTVNSGR]	>sp|P32915	197	207	{0	S205		20150415_Debelyy_7263_SCX-frct-FT-2ul.10411.10411.2	2125.66	(L)
148	4	172	830.749	3	2490.23	2490.24	-4.36	[DQGMVINGKR]	>sp|P32915	397	406	{MARASEKGEEK]	>sp|P35179	1	11	K405	K7		20150730_Debelyy-G-7664-elu-dil10x-4ul-140min.32118.32118.3	6806.83	(L)
133	1	146	905.24	4	3617.94	3617.95	-4.3	[ETSIYRELKK]	>sp|P32915	407	416	[KQSNNQVEKLVEAPVEFVR]	>sp|P35179	12	30	T408	K12		20150922_Debelyy_7777-dil20x-2ul-140min.23588.23588.4	7006.22	(L)
62	1	83	987.511	2	1974.02	1974.02	-1.64	[GEEKK]	>sp|P35179	8	12	[TWIEISGTSPR]	>sp|P32915	379	389	K11	T386		20160201_Debelyy_8080-FT.16846.16846.2	5082.9	(L)
74	1	92	987.511	2	1974.02	1974.02	-1.33	[GEEKK]	>sp|P35179	8	12	[TWIEISGTSPR]	>sp|P32915	379	389	K11	T386		20160201_Debelyy_8080-SCX2.19527.19527.2	5112.19	(L)
82	3	84	1022.86	3	3066.57	3066.57	-1.94	{mARASEKGEEK]	>sp|P35179	1	11	[TWIEISGTSPRDIAK]	>sp|P32915	379	393	{0	S384		20150206_Debelyy_7263-d10x-2ul-140min.43303.43303.3	0]=6731.4534	(H)
148	2	561	1094.58	2	2188.15	2188.14	3.7	{MAR]	>sp|P35179	1	3	[TWIEISGTSPRDIAK]	>sp|P32915	379	393	{0	T386	2	20150730_Debelyy-G-7664-elu-dil10x-4ul-140min.28293.28293.2	6120.58	(L)
								Number of amino acids in peptide 1				Number of amino acids in peptide 2
								5				7
								4				7
								4				7
								4				7
								3				8
								4				5
								5				11
								7				10
								7				11
								8				11
								3				11
								10				11
								10				19
								5				11
								5				11
								11				15
								3				15
Sec61p-Sss1p_EDC
FDR<0.05	Nr.	Score	m/z	z	M+H+	calc.	Dev.	Peptide(1)	Protein(1)	From(1)	To(1)	Peptide(2)	Protein(2)	From(1)	To(2)	Site(1)	Site(2)	Rank	Scan	RT
200	1	226	540.943	3	1620.82	1620.82	-0.25	{mAR]	>sp|P35179	0	3	[TWIEISGTSPR]	>sp|P32915	379	389	{0	E382		20160201_Debelyy_8078-SCX6.9078.9078.3	2528.2
91	91	133	660.601	4	2639.38	2639.39	-4.86	{MARASEKGEEK]	>sp|P35179	0	11	[RETSIYRELKK]	>sp|P32915	406	416	{0	E413		20150922_Debelyy_7779-dil20x-2ul-140min.15431.15431.4	4891.27
91	34	117	678.885	4	2712.52	2712.5	4.75	[ELKK]	>sp|P32915	413	416	[KQSNNQVEKLVEAPVEFVR]	>sp|P35179	12	30	K415	E23		20150922_Debelyy_7779-dil20x-2ul-140min.17472.17472.4	5418
91	34	101	678.885	4	2712.52	2712.5	4.75	[ELKK]	>sp|P32915	413	416	[KQSNNQVEKLVEAPVEFVR]	>sp|P35179	12	30	E413	K12		20150922_Debelyy_7779-dil20x-2ul-140min.17472.17472.4	5418
91	34	101	678.885	4	2712.52	2712.5	4.75	[ELKK]	>sp|P32915	413	416	[KQSNNQVEKLVEAPVEFVR]	>sp|P35179	12	30	E413	K20		20150922_Debelyy_7779-dil20x-2ul-140min.17472.17472.4	5418
91	34	101	678.885	4	2712.52	2712.5	4.75	[ELKK]	>sp|P32915	413	416	[KQSNNQVEKLVEAPVEFVR]	>sp|P35179	12	30	K415	E19		20150922_Debelyy_7779-dil20x-2ul-140min.17472.17472.4	5418
148	2	178	635.68	3	1905.03	1905.02	3.94	[DIAKQFK]	>sp|P32915	390	396	[KQSNNQVEK]	>sp|P35179	12	20	D390	K12		24592	6922
128	1	129	635.68	3	1905.03	1905.02	4.03	[DIAKQFK]	>sp|P32915	390	396	[KQSNNQVEK]	>sp|P35179	12	20	D390	K12		23862	6778
49	1	70	545.317	2	1089.63	1089.63	0.31	[KDKK]	>sp|P32915	226	229	[GEEKK]	>sp|P35179	8	12	K226	E9		20160201_Debelyy_8078-FT.19212.19212.2	5766.62
49	1	69	545.317	2	1089.63	1089.63	0.31	[KDKK]	>sp|P32915	226	229	[GEEKK]	>sp|P35179	8	12	K228	E9		20160201_Debelyy_8078-FT.19212.19212.2	5766.62
49	1	61	545.317	2	1089.63	1089.63	0.31	[KDKK]	>sp|P32915	226	229	[GEEKK]	>sp|P35179	8	12	K226	E10		20160201_Debelyy_8078-FT.19212.19212.2	5766.62
49	1	60	545.317	2	1089.63	1089.63	0.31	[KDKK]	>sp|P32915	226	229	[GEEKK]	>sp|P35179	8	12	D227	K11		20160201_Debelyy_8078-FT.19212.19212.2	5766.62
49	1	60	545.317	2	1089.63	1089.63	0.31	[KDKK]	>sp|P32915	226	229	[GEEKK]	>sp|P35179	8	12	K228	E10		20160201_Debelyy_8078-FT.19212.19212.2	5766.62
121	1	162	732.408	2	1463.81	1463.81	-1.37	[KDKKR]	>sp|P32915	226	230	{mARASEK]	>sp|P35179	0	7	K229	E6		20160201_Debelyy_8078-SCX5.8020.8020.2	2275.48
162	1	226	540.943	3	1620.82	1620.82	-0.25	{mAR]	>sp|P35179	0	3	[TWIEISGTSPR]	>sp|P32915	379	389	{0	E382		20160201_Debelyy_8078-SCX6.9078.9078.3	2528.2
162	2	199	549.848	2	1098.69	1098.69	0.53	[ELKK]	>sp|P32915	413	416	[KPDLK]	>sp|P35179	41	45	K415	D43		20160201_Debelyy_8078-SCX6.5601.5601.2	1810.97
Sec61p-Sss1p_EDC
Ions from a single experiment or merged file that were just interpreted in different ways are counted only once; lines not to be considered for the statistics are in light grey
FDR<0.05	Nr.	Score	m/z	z	M+H+	calc.	Dev.	Peptide(1)	Protein(1)	From(1)	To(1)	Peptide(2)	Protein(2)	From(1)	To(2)	Site(1)	Site(2)	Rank	Scan	RT
200	1	226	540.943	3	1620.82	1620.82	-0.25	{mAR]	>sp|P35179	0	3	[TWIEISGTSPR]	>sp|P32915	379	389	{0	E382		20160201_Debelyy_8078-SCX6.9078.9078.3	2528.2
162	1	226	540.943	3	1620.82	1620.82	-0.25	{mAR]	>sp|P35179	0	3	[TWIEISGTSPR]	>sp|P32915	379	389	{0	E382		20160201_Debelyy_8078-SCX6.9078.9078.3	2528.2
49	1	70	545.317	2	1089.63	1089.63	0.31	[KDKK]	>sp|P32915	226	229	[GEEKK]	>sp|P35179	8	12	K226	E9		20160201_Debelyy_8078-FT.19212.19212.2	5766.62
49	1	69	545.317	2	1089.63	1089.63	0.31	[KDKK]	>sp|P32915	226	229	[GEEKK]	>sp|P35179	8	12	K228	E9		20160201_Debelyy_8078-FT.19212.19212.2	5766.62
49	1	61	545.317	2	1089.63	1089.63	0.31	[KDKK]	>sp|P32915	226	229	[GEEKK]	>sp|P35179	8	12	K226	E10		20160201_Debelyy_8078-FT.19212.19212.2	5766.62
49	1	60	545.317	2	1089.63	1089.63	0.31	[KDKK]	>sp|P32915	226	229	[GEEKK]	>sp|P35179	8	12	D227	K11		20160201_Debelyy_8078-FT.19212.19212.2	5766.62
49	1	60	545.317	2	1089.63	1089.63	0.31	[KDKK]	>sp|P32915	226	229	[GEEKK]	>sp|P35179	8	12	K228	E10		20160201_Debelyy_8078-FT.19212.19212.2	5766.62
162	2	199	549.848	2	1098.69	1098.69	0.53	[ELKK]	>sp|P32915	413	416	[KPDLK]	>sp|P35179	41	45	K415	D43		20160201_Debelyy_8078-SCX6.5601.5601.2	1810.97
128	1	129	635.68	3	1905.03	1905.02	4.03	[DIAKQFK]	>sp|P32915	390	396	[KQSNNQVEK]	>sp|P35179	12	20	D390	K12		23862	6778
148	2	178	635.68	3	1905.03	1905.02	3.94	[DIAKQFK]	>sp|P32915	390	396	[KQSNNQVEK]	>sp|P35179	12	20	D390	K12		24592	6922
91	91	133	660.601	4	2639.38	2639.39	-4.86	{MARASEKGEEK]	>sp|P35179	0	11	[RETSIYRELKK]	>sp|P32915	406	416	{0	E413		20150922_Debelyy_7779-dil20x-2ul-140min.15431.15431.4	4891.27
91	34	117	678.885	4	2712.52	2712.5	4.75	[ELKK]	>sp|P32915	413	416	[KQSNNQVEKLVEAPVEFVR]	>sp|P35179	12	30	K415	E23		20150922_Debelyy_7779-dil20x-2ul-140min.17472.17472.4	5418
91	34	101	678.885	4	2712.52	2712.5	4.75	[ELKK]	>sp|P32915	413	416	[KQSNNQVEKLVEAPVEFVR]	>sp|P35179	12	30	E413	K12		20150922_Debelyy_7779-dil20x-2ul-140min.17472.17472.4	5418
91	34	101	678.885	4	2712.52	2712.5	4.75	[ELKK]	>sp|P32915	413	416	[KQSNNQVEKLVEAPVEFVR]	>sp|P35179	12	30	E413	K20		20150922_Debelyy_7779-dil20x-2ul-140min.17472.17472.4	5418
91	34	101	678.885	4	2712.52	2712.5	4.75	[ELKK]	>sp|P32915	413	416	[KQSNNQVEKLVEAPVEFVR]	>sp|P35179	12	30	K415	E19		20150922_Debelyy_7779-dil20x-2ul-140min.17472.17472.4	5418
121	1	162	732.408	2	1463.81	1463.81	-1.37	[KDKKR]	>sp|P32915	226	230	{mARASEK]	>sp|P35179	0	7	K229	E6		20160201_Debelyy_8078-SCX5.8020.8020.2	2275.48
Sec61p-Sss1p_EDC
Ions not to be considered for statistics are removed
FDR<0.05	Nr.	Score	m/z	z	M+H+	calc.	Dev.	Peptide(1)	Protein(1)	From(1)	To(1)	Peptide(2)	Protein(2)	From(1)	To(2)	Site(1)	Site(2)	Rank	Scan	RT
200	1	226	540.943	3	1620.82	1620.82	-0.25	{mAR]	>sp|P35179	1	3	[TWIEISGTSPR]	>sp|P32915	379	389	{0	E382		20160201_Debelyy_8078-SCX6.9078.9078.3	2528.2
49	1	70	545.317	2	1089.63	1089.63	0.31	[KDKK]	>sp|P32915	226	229	[GEEKK]	>sp|P35179	8	12	K226	E9		20160201_Debelyy_8078-FT.19212.19212.2	5766.62
162	2	199	549.848	2	1098.69	1098.69	0.53	[ELKK]	>sp|P32915	413	416	[KPDLK]	>sp|P35179	41	45	K415	D43		20160201_Debelyy_8078-SCX6.5601.5601.2	1810.97
128	1	129	635.68	3	1905.03	1905.02	4.03	[DIAKQFK]	>sp|P32915	390	396	[KQSNNQVEK]	>sp|P35179	12	20	D390	K12		23862	6778
148	2	178	635.68	3	1905.03	1905.02	3.94	[DIAKQFK]	>sp|P32915	390	396	[KQSNNQVEK]	>sp|P35179	12	20	D390	K12		24592	6922
91	91	133	660.601	4	2639.38	2639.39	-4.86	{MARASEKGEEK]	>sp|P35179	1	11	[RETSIYRELKK]	>sp|P32915	406	416	{0	E413		20150922_Debelyy_7779-dil20x-2ul-140min.15431.15431.4	4891.27
91	34	117	678.885	4	2712.52	2712.5	4.75	[ELKK]	>sp|P32915	413	416	[KQSNNQVEKLVEAPVEFVR]	>sp|P35179	12	30	K415	E23		20150922_Debelyy_7779-dil20x-2ul-140min.17472.17472.4	5418
121	1	162	732.408	2	1463.81	1463.81	-1.37	[KDKKR]	>sp|P32915	226	230	{mARASEK]	>sp|P35179	1	7	K229	E6		20160201_Debelyy_8078-SCX5.8020.8020.2	2275.48
								Number of amino acids in peptide 1				Number of amino acids in peptide 2
								3				11
								4				5
								4				5
								7				9
								7				9
								11				11
								4				19
								5				7
